# Supplementary material for: Interplay between anisotropy and magnetic exchange to modulate the magnetic relaxation behaviours of phenoxo bridged Dy2dimers with axial β-diketonate co-ligands
Source: Royal Society of Chemistry journal article supplement (doi:10.1039/d2dt03117e), 2022-01-01
Supplement: d2dt03117e1.pdf [file d2dt03117e1.pdf]

## Supporting Information

### Table of Contents

| Sr. No     | Title                                                                                                                                                    | Page No. |
|------------|----------------------------------------------------------------------------------------------------------------------------------------------------------|----------|
| Table S1   | Selected Bond Distances (Å) and Bond angles (°) for <b>1</b>                                                                                             | 4        |
| Table S2   | Selected Bond Distances (Å) and Bond angles (°) for <b>2</b>                                                                                             | 4        |
| Table S3   | Continuous Shape Measures calculation for the Dy <sup>III</sup> ions in <b>1-3</b>                                                                       | 5        |
| Table S4   | Comparison of Bond Angle and Bond Length of different Dy <sub>2</sub> complexes<br>Bond length and Bond angle of homonuclear Ln Complex.                 | 5        |
| Table S5.  | Selected Bond Distances (Å) and Bond angles (°) for <b>3</b>                                                                                             | 7        |
| Table S6   | Some notable examples of oxygen atom bridged groups of Dysprosium complex having SMM Properties                                                          | 10       |
| Table S7.  | Best fitted parameters ( $\chi_T$ , $\chi_S$ , $\tau$ and $\alpha$ ) with the extended Debye model for complex <b>2</b> in the temperature range 2-12 K. | 16       |
| Table S8.  | Best fitted parameters ( $\chi_T$ , $\chi_S$ , $\tau$ and $\alpha$ ) with the extended Debye model for complex <b>3</b> in the temperature range 2-12 K. | 17       |
| Table S9.  | Calculated energy spectrum, g tensors, and the $\Phi$ and $\theta$ angles computed for complex <b>1</b> .                                                | 18       |
| Table S10. | Calculated energy spectrum, g tensors, and the $\Phi$ and $\theta$ angles computed for complex <b>2</b>                                                  | 19       |
| Table S11. | Calculated energy spectrum, g tensors, and the $\Phi$ and $\theta$ angles computed for complex <b>3</b> .                                                | 20       |
| Table S12. | SINGLE_ANISO computed crystal field parameters for the Dy <sup>III</sup> in complex <b>1</b>                                                             | 22       |
| Table S13. | SINGLE_ANISO computed crystal field parameters for the Dy <sup>III</sup> in complex <b>2</b> .                                                           | 24       |
| Table S14. | SINGLE_ANISO computed crystal field parameters for the Dy <sup>III</sup> in complex <b>3</b> .                                                           | 25       |
| Table S15. | CASSCF computed LoProp charges per central atom and first coordination sphere ligand atoms in the ground state of complexes <b>1-3</b> .                 | 27       |
| Table S16. | BS-DFT computed energies of high-spin and broken-symmetry solution of complex <b>1</b> using $H=-2JS_1S_2$ formalism.                                    | 28       |

## Supporting Information

|            |                                                                                                                                                                                                                                                        |    |
|------------|--------------------------------------------------------------------------------------------------------------------------------------------------------------------------------------------------------------------------------------------------------|----|
| Table S17. | BS-DFT computed energies of high-spin and broken-symmetry solution of complex <b>2</b> using $H=-2JS_1S_2$ formalism.                                                                                                                                  | 29 |
| Table S18. | BS-DFT computed energies of high-spin and broken-symmetry solution of complex <b>3</b> using $H=-2JS_1S_2$ formalism.                                                                                                                                  | 30 |
| Table S19. | Energies ( $\text{cm}^{-1}$ ), corresponding tunnel splitting ( $\Delta_{\text{tun}}$ ) and g tensors of the low-lying exchange doublet state in complex <b>1-3</b> .                                                                                  | 31 |
| Table S20. | SINGLE_ANISO computed wave function decomposition analysis for Dy1 centre and Dy2 centre in complex <b>1</b> . The major dominating values are kept in bold.                                                                                           | 32 |
| Table S21. | SINGLE_ANISO computed wave function decomposition analysis for Dy1 centre and Dy2 centre in complex <b>2</b> . The major dominating values are kept in bold.                                                                                           | 34 |
| Table S22. | SINGLE_ANISO computed wave function decomposition analysis for Dy1 centre and Dy2 centre in complex <b>3</b> . The major dominating values are kept in bold.                                                                                           | 37 |
| Table S23  | Crystal data and structure refinement details of <b>1</b> to <b>3</b> .                                                                                                                                                                                | 38 |
| Figure S1  | Distorted Trigonal Dodecahedron Geometry                                                                                                                                                                                                               | 9  |
| Figure S2  | Supramolecular one-dimensional Zigzag Chain for <b>1</b>                                                                                                                                                                                               | 10 |
| Figure S3  | Supramolecular Interaction C-H $\cdots$ F and C-H $\cdots$ $\pi$ interactions for <b>2</b>                                                                                                                                                             | 11 |
| Figure S4  | Supramolecular interaction for <b>3</b> .                                                                                                                                                                                                              | 11 |
| Figure S5  | Experimental PXRD patterns and simulated patterns generated from single crystal X-ray diffraction data for complexes <b>1</b> (a), <b>2</b> (b) and <b>3</b> (c).                                                                                      | 12 |
| Figure S6  | TGA of complexes <b>1</b> , <b>2</b> and <b>3</b> .                                                                                                                                                                                                    | 12 |
| FigureS7   | Temperature dependence of the magnetization of <b>1</b> at different fields                                                                                                                                                                            | 13 |
| FigureS8   | Temperature dependence of the magnetization of <b>2</b> at different fields.                                                                                                                                                                           | 13 |
| Figure S9  | Temperature dependence of the magnetization of <b>3</b> at different fields.                                                                                                                                                                           | 14 |
| FigureS10  | Temperature dependence of the in-phase (left) and out-of-phase (right) ac susceptibility at the indicated frequency range ranges for complexes <b>1-3</b> respectively under the zero field. Plots a and b for <b>1</b> , plots c and d for <b>2</b> , | 15 |

## Supporting Information

|            |                                                                                                                                                                                                                                                                                                          |    |
|------------|----------------------------------------------------------------------------------------------------------------------------------------------------------------------------------------------------------------------------------------------------------------------------------------------------------|----|
|            | plots e and f for <b>3</b> respectively.                                                                                                                                                                                                                                                                 |    |
| Figure S11 | Plots of $\ln(\chi''/\chi')$ versus $1/T$ for <b>1</b> . The solid line represents the fitting results                                                                                                                                                                                                   | 16 |
| Figure S12 | <i>Ab initio</i> SINGLE_ANISO computed magnetization blockade barrier for Dy(1a) based mononuclear fragments of complexes a) <b>1</b> and b) <b>2</b> [Relaxation mechanisms out of Dy(1b) based fragments of the respective complexes resemble exactly to the corresponding Dy(1a) congeners].          | 21 |
| Figure S13 | <i>Ab initio</i> SINGLE_ANISO computed magnetization blockade barrier for a) Dy(1a) and b) Dy(1b) based mononuclear fragments of <b>3</b> .                                                                                                                                                              | 21 |
| Figure S14 | CASSCF computed LoProp charges on the Dy and first coordination sphere ligated atoms in complex <b>1</b> .                                                                                                                                                                                               | 26 |
| Figure S15 | CASSCF computed LoProp charges on the Dy and first coordination sphere ligated atoms in complex <b>2</b> .                                                                                                                                                                                               | 26 |
| Figure S16 | CASSCF computed LoProp charges on the Dy and first coordination sphere ligated atoms in complex <b>3</b>                                                                                                                                                                                                 | 27 |
| Scheme S1  | Exchange model employed model Dy-Dy series ( <b>1-3</b> )                                                                                                                                                                                                                                                | 31 |
| Figure S17 | DFT calculated spin-density plot for the ground state ( $S=0$ ) of complex <b>1</b> (a) HS and (b) BS; the positive and negative spin densities are represented by orange and purple colour, respectively. The isodensity surface represented here corresponds to a value of $0.001 e^-/\text{bohr}^3$ . | 33 |
| Figure S18 | DFT calculated spin-density plot for the ground state ( $S=0$ ) of complex <b>2</b> (a) HS and (b) BS; the positive and negative spin densities are represented by orange and purple colour, respectively. The isodensity surface represented here corresponds to a value of $0.001 e^-/\text{bohr}^3$ . | 34 |
| Figure S19 | DFT calculated spin-density plot for the ground state ( $S=0$ ) of complex <b>3</b> (a) HS and (b) BS; the positive and negative spin densities are represented by orange and purple colour, respectively. The isodensity surface represented here corresponds to a value of $0.001 e^-/\text{bohr}^3$ . | 34 |
| Figure S20 | DFT calculated overlap integrals for complex <b>1</b> . The isodensity surface represented here corresponds to a value of $0.03 e^-/\text{bohr}^3$ .                                                                                                                                                     | 35 |
| Figure S21 | DFT calculated overlap integrals for complex <b>2</b> . The isodensity surface represented here corresponds to a value of $0.03 e^-/\text{bohr}^3$ .                                                                                                                                                     | 36 |
| Figure S22 | DFT calculated overlap integrals for complex <b>3</b> . The isodensity surface                                                                                                                                                                                                                           | 37 |

## Supporting Information

|  |                                                                                      |  |
|--|--------------------------------------------------------------------------------------|--|
|  | represented here corresponds to a value of 0.03 e <sup>-</sup> / bohr <sup>3</sup> . |  |
|--|--------------------------------------------------------------------------------------|--|

**Table S1.** Selected Bond Distances (Å) and Bond angles (°) for **1**

| Bond Lengths around Dy |           | Bond Angle    |             |
|------------------------|-----------|---------------|-------------|
| Dy1- Dy1a              | 3.7618(4) | Dy1 -O1- Dy1a | 107.61(10)  |
| Dy1- O1                | 2.309(3)  | N1a-Dy1- N2a  | 64.86(12)   |
| Dy1- O1a               | 2.352(3)  | O4-Dy1-O5     | 70.885(106) |
| Dy1- O2                | 2.348(3)  | O3a-Dy1a-O2a  | 70.578(106) |
| Dy1- O3                | 2.364(3)  |               |             |
| Dy1- O4                | 2.353(3)  |               |             |
| Dy1- O5                | 2.360(3)  |               |             |

‘a’ atoms are generated by the symmetry operation: (1-x,1-y,1-z)

**Table S2.** Selected Bond Distances (Å) and Bond angles (°) for **2**

| Bond Lengths around Dy |           | Bond Angle    |             |
|------------------------|-----------|---------------|-------------|
| Dy1- Dy1a              | 3.7721(8) | Dy1- O1- Dy1a | 107.20(10)  |
| Dy1- O1                | 2.320(3)  | N1a- Dy1- N2a | 64.61(11)   |
| Dy1- O1a               | 2.366(3)  | O5-Dy1-O4     | 71.701(100) |
| Dy1- O2                | 2.345(3)  | O2a-Dy1-O3a   | 71.639(101) |
| Dy1- O3                | 2.336(3)  |               |             |
| Dy1- O4                | 2.342(3)  |               |             |
| Dy1- O5                | 2.351(3)  |               |             |

‘a’ atoms are generated by the symmetry operation: (1-x,1-y,1-z)

## Supporting Information

**Table S3.** Continuous Shape Measurements for the Dy<sup>III</sup> ions in **1-3**.

| Complex 1 |        |        |        |        |        |              |        |          |         |        |       |        |         |
|-----------|--------|--------|--------|--------|--------|--------------|--------|----------|---------|--------|-------|--------|---------|
| Sites     | OP-8   | HPY-8  | HBPY-8 | CU-8   | SAPR-8 | <b>TDD-8</b> | JGBF-8 | JETBPY-8 | JBTPR-8 | BTPR-8 | JSD-8 | TT-8   | ETBPY-8 |
| Dy1       | 32.310 | 25.081 | 16.991 | 10.495 | 3.177  | <b>0.505</b> | 13.827 | 30.798   | 3.357   | 2.564  | 3.034 | 11.318 | 25.171  |
| Dy2       | 32.310 | 25.081 | 16.991 | 10.495 | 3.177  | <b>0.505</b> | 13.827 | 30.798   | 3.357   | 2.564  | 3.034 | 11.318 | 25.171  |
| Complex 2 |        |        |        |        |        |              |        |          |         |        |       |        |         |
| Sites     | OP-8   | HPY-8  | HBPY-8 | CU-8   | SAPR-8 | <b>TDD-8</b> | JGBF-8 | JETBPY-8 | JBTPR-8 | BTPR-8 | JSD-8 | TT-8   | ETBPY-8 |
| Dy1       | 31.928 | 24.477 | 17.093 | 10.404 | 2.703  | <b>0.544</b> | 13.469 | 30.647   | 3.091   | 2.331  | 3.020 | 11.256 | 24.683  |
| Dy2       | 31.928 | 24.477 | 17.093 | 10.404 | 2.703  | <b>0.544</b> | 13.469 | 30.647   | 3.091   | 2.331  | 3.020 | 11.256 | 24.683  |
| Complex 3 |        |        |        |        |        |              |        |          |         |        |       |        |         |
| Sites     | OP-8   | HPY-8  | HBPY-8 | CU-8   | SAPR-8 | <b>TDD-8</b> | JGBF-8 | JETBPY-8 | JBTPR-8 | BTPR-8 | JSD-8 | TT-8   | ETBPY-8 |
| Dy1       | 33.942 | 20.717 | 16.208 | 12.533 | 4.076  | <b>1.973</b> | 12.822 | 26.898   | 3.537   | 2.938  | 4.034 | 12.946 | 22.631  |
| Dy2       | 33.030 | 23.602 | 15.826 | 12.667 | 3.717  | <b>1.324</b> | 11.786 | 27.384   | 2.845   | 2.174  | 2.958 | 13.193 | 24.249  |

**Table S4.** Comparison of Bond Angle and Bond Length of Different Dy<sub>2</sub> Complexes.

| Metal Complexes                                                                                                                      | Dy-O <sub>phenoxy</sub> (Å) | Dy-N <sub>imine</sub> (Å) | Dy-Dy (Å) | Dy-O <sub>phenoxy</sub> -Dy(°) | Ref |
|--------------------------------------------------------------------------------------------------------------------------------------|-----------------------------|---------------------------|-----------|--------------------------------|-----|
| [Dy <sup>III</sup> <sub>2</sub> (valdien) <sub>2</sub> (NO <sub>3</sub> ) <sub>2</sub> ] <sup>a</sup>                                | 2.31-2.33                   | 2.50-2.52                 | 3.76      | 108.22                         | 1   |
| [Dy <sub>2</sub> (tfa) <sub>4</sub> L <sub>2</sub> ] <sup>b</sup>                                                                    | 2.30-2.37                   | 2.66-2.45                 | 3.81      | 108.72                         | 2   |
| [Dy <sub>2</sub> ((L) <sub>2</sub> ) · 2CH <sub>3</sub> CN <sup>c</sup>                                                              | 2.24-2.33                   | 2.49-2.75                 | 3.89      | 110.4                          | 3   |
| [Dy <sub>2</sub> (MeOH) <sub>2</sub> (HL <sub>1</sub> ) <sub>2</sub> (NO <sub>3</sub> ) <sub>2</sub> ] · 2MeOH <sup>d</sup>          | 2.24                        | 2.46                      | 3.70      | 110.72                         | 4   |
| [Dy <sub>2</sub> (L) <sub>2</sub> (DBM) <sub>2</sub> (DMA) <sub>2</sub> ] · 2DMA · 2CH <sub>3</sub> CN <sup>e</sup>                  | 2.34                        | 2.48                      | 3.75      | 105.52                         | 5   |
| Dy <sub>2</sub> (ovph) <sub>2</sub> (NO <sub>3</sub> ) <sub>2</sub> (H <sub>2</sub> O) <sub>2</sub> · 3H <sub>2</sub> O <sup>f</sup> | 2.17                        | 2.45                      | 3.82      | 110.12                         | 6   |
| [Dy <sup>III</sup> <sub>2</sub> (Hhmb) <sub>3</sub> (NCS) <sub>3</sub> ] · 2MeOH · py, <sup>g</sup>                                  | 2.29-2.43                   | 2.54                      | 3.56      | 96.1                           | 7   |
| [Dy <sub>2</sub> (LH) <sub>2</sub> (μ <sub>2</sub> -Piv-κ <sub>2</sub>                                                               | 2.387                       | 2.501                     | 3.67      | 100.39                         | 8   |

## Supporting Information

|                                               |            |                |      |        |    |
|-----------------------------------------------|------------|----------------|------|--------|----|
| $O,O')_2(NO_3-\kappa_2 O,O')_2]$ <sup>h</sup> |            |                |      |        |    |
| $[Dy_2L_3](ClO_4)_3 \cdot 6CH_3OH^i$          | 2.30-2.32  | 2.56–<br>2.61  | 3.49 | 96.86  | 9  |
| $[Dy_2(acac)_2(L)_2(EtOH)_2]^j$               | 2.20–2.40  | 2.41           | 3.97 | 113.01 | 10 |
| $[Dy_2(L_1)_2(piv)_2]^k$                      | 2.18-2.42  | 2.54-<br>2.36  | 3.78 | 110.19 | 11 |
| $[Dy_2(opch)_2(OAc)_2(H_2O)_2] \cdot MeOH^l$  | 2.14- 2.41 | 2.47-<br>2.56  | 3.89 | 113.1  | 12 |
| $[Dy(tfa)_2(L)_2]^m$                          | 2.32-2.37  | 2.45 -<br>2.68 | 3.83 | 109.2  | 13 |
| $[Dy(LH_3)Cl_2]_2 \cdot 2Et_2O^n$             | 2.28       | 2.45           | 3.68 | 105.51 | 14 |

### Abbreviations:

- a)  $H_2valdien = N1,N3$ -bis(3-methoxysalicylidene) diethylenetriamine),
- b) HL = 2-[[[(4-bromophenyl)-imino]methyl]-8-hydroxyquinoline, tfa = trifluoroacetylacetonate
- c)  $H_3L = N1,N2,N3,N4$ -tri(3-methoxysalicylidene) triethylenetetramine
- d)  $H_3L_1 = 3$ -(((2-hydroxynaphthaen-1-yl)methylene)amino)- propane-1,2-diol
- e)  $H_2L = 2$ -(2-hydroxy-3- methoxybenzylideneamino)phenol, HDBM = dibenzoylmethane, DMA = dimethylacetamide,
- f)  $H_2ovph = N'$ -(2-hydroxy-3-methoxybenzylidene)picolinohydrazide
- g)  $H_2hmb = N'$ -(2-hydroxy-3-methoxybenzylidene)benzhydrazide
- h)  $LH_2 = N'$ - (2-hydroxy-3-methoxybenzylidene)acetohydrazide
- i) HL= 2,6-diformyl-4-methylphenol di(benzoylhydrazone
- j)  $H_2L = N'$ -(2-hydroxy-5-methylphenyl)-pyrazine-2-carbohydrazide, Hacac = acetylacetonate
- k)  $H_2L_1 = N1,N3$ -bis(salicylaldehyde)diethylenetriamine
- l)  $H_2opch = (E)$ - $N'$ -(2-hydroxy-3-methoxybenzylidene)pyrazine-2-carbohydrazide
- m) HL = 2-[[[(4-methylphenyl)imino]methyl]-8-hydroxyquinoline
- n)  $LH_4 = 2,3$ -dihydroxybenzylidene)-2-(hydroxyimino)propanehydrazide

## Supporting Information

**Table S5.** Selected Bond Distances (Å) and Bond angles (°) for **3**

| Bond Lengths around Dy |           | Bond Angle   |             |
|------------------------|-----------|--------------|-------------|
| Dy1- Dy2               | 3.8422(6) | Dy1- O1- Dy2 | 109.16(19)  |
| Dy1- O1                | 2.423(5)  | Dy1- O6- Dy2 | 110.21(19)  |
| Dy1- O6                | 2.333(5)  | O2-Dy1-O3    | 71.892(221) |
| Dy1- O3                | 2.266(6)  | O4-Dy2-O5    | 71.253(213) |
| Dy1- O4                | 2.359(7)  |              |             |
| Dy1- O5                | 2.285(6)  |              |             |
| Dy2- O1                | 2.291(5)  |              |             |
| Dy2- O6                | 2.351(5)  |              |             |
| Dy2- O8                | 2.277(5)  |              |             |
| Dy2- O7                | 2.253(5)  |              |             |
| Dy2- O9                | 2.438(6)  |              |             |

**Table S6.** Fitted exchange coupling constants,  $J^{\text{exch}}$  ( $\text{cm}^{-1}$ ), for 1-3 and the Reported Phenoxido-Bridged  $\text{Dy}_2$  Complexes

| $\text{Dy}_2$ Complex                                                                           | Dy-Dy (Å) | <Dy-O-Dy (°) | $J^{\text{exchange}}$ | $U_{\text{eff}}/\text{K}$ and Relaxation time ( $\tau_0$ )/s | ref |
|-------------------------------------------------------------------------------------------------|-----------|--------------|-----------------------|--------------------------------------------------------------|-----|
| $[\text{Dy}_2(\text{a}^{\text{povh}})_2(\text{OAc})_2(\text{DMF})_2]^{\text{a}}$                | 3.67      | 102.62       | -8.375                | 322.1 K,<br>$\tau_0 = 3.4 \times 10^{-9}$                    | 15  |
| $[\text{Dy}_2(\text{nb})_4(\text{H}_3\text{L})_2]^{\text{b}}$                                   | 3.69      | 105.24       | -2.75                 | 290.1 K,<br>$\tau_0 = 5.54 \times 10^{-12}$                  | 16  |
| $[\text{Dy}_2(\text{Pc})_2(\text{L-OCH}_3)_2(\text{H}_2\text{O})] \cdot 2\text{THF}^{\text{c}}$ | 3.93      | 106.4        | -1.23                 | 58.8K,<br>$\tau_0 = 1.12 \times 10^{-8}$                     | 17  |
| $[\text{Dy}_2(\text{L})_2(\text{NO}_3)_2(\text{MeOH})_2]^{\text{d}}$                            | 3.72      | 106.4        | -6.00                 | 97.42 K,                                                     | 18  |

## Supporting Information

|                                                                                                                                      |             |                |              |                                                   |                  |
|--------------------------------------------------------------------------------------------------------------------------------------|-------------|----------------|--------------|---------------------------------------------------|------------------|
|                                                                                                                                      |             |                |              | $\tau_0 = 2.80 \times 10^{-5}$                    |                  |
| <b>[Dy<sub>2</sub>(LH<sub>1</sub>)<sub>2</sub>(tfa)<sub>4</sub>]</b>                                                                 | <b>3.77</b> | <b>107.198</b> | <b>-0.12</b> | <b>21.63 K,</b><br>$\tau_0 = 7.32 \times 10^{-6}$ | <b>This work</b> |
| <b>[Dy<sub>2</sub>(LH<sub>1</sub>)<sub>2</sub>(hfac)<sub>4</sub>]</b>                                                                | <b>3.76</b> | <b>107.602</b> | <b>-0.20</b> | <b>9.04 K,</b><br>$\tau_0 = 3.19 \times 10^{-6}$  | <b>This work</b> |
| [Dy <sub>2</sub> (valdien) <sub>2</sub> (NO <sub>3</sub> ) <sub>2</sub> ] <sup>e</sup>                                               | 3.76        | 108.22         | -0.21        | 76 K,<br>$\tau_0 = 6.04 \times 10^{-7}$           | 1                |
| [Dy <sub>2</sub> L(O <sub>2</sub> CPh) <sub>2</sub> ] <sup>f</sup> ·2MeOH <sup>f</sup>                                               | 3.79        | 108.44°        | -1.25        | 47.51 K,<br>$\tau_0 = 6.42 \times 10^{-6}$        | 19               |
| Dy <sub>2</sub> (dbm) <sub>2</sub> (LH) <sub>2</sub> ·H <sub>2</sub> O <sup>g</sup>                                                  | 3.80        | 109.5          | 9.49         | 76.18 K,<br>$\tau_0 = 2.54 \times 10^{-8}$        | 20               |
| [Dy <sub>2</sub> (L <sup>1</sup> ) <sub>2</sub> (piv) <sub>2</sub> ] <sup>h</sup>                                                    | 3.79        | 110.19         | -1.50        | 40.32 K,<br>$\tau_0 = 3.06 \times 10^{-6}$        | 11               |
| <b>[Dy<sub>2</sub>(LH<sub>1</sub>)<sub>2</sub>(NO<sub>3</sub>)(tmhd)<sub>3</sub>]</b>                                                | <b>2.38</b> | <b>110.25</b>  | <b>-0.09</b> | <b>25.65 K,</b><br>$\tau_0 = 4.86 \times 10^{-5}$ | <b>This work</b> |
| [Dy(acac) <sub>2</sub> (CH <sub>3</sub> OH) <sub>2</sub> ] <sub>2</sub> (μ-HMq) <sub>2</sub> <sup>i</sup>                            | 3.92        | 112.71         | -0.75        | 65.3 K,<br>$\tau_0 = 6.3 \times 10^{-8}$          | 21               |
| [Dy <sub>2</sub> (DMOP) <sub>2</sub> (DBM) <sub>4</sub> (C <sub>2</sub> H <sub>4</sub> Cl <sub>2</sub> ) <sub>2</sub> ] <sup>j</sup> | 3.84        | 113.32         | -2.51        | 147.2 K,<br>$\tau_0 = 2.3 \times 10^{-8}$         | 22               |

### Abbreviations:

- a) H<sub>2</sub>a'povh=N'-[amino(pyrimidin-2-yl)methylene]-o-vanilloyl hydrazine)
- b) H<sub>3</sub>L =2-hydroxyimino-N'-[(2-hydroxy- 3-methoxyphenyl)methylidene] propanohydrazone  
Hnb = m-nitrobenzoic acid
- c) H<sub>2</sub>Pc = Phthalocyanine, HL-OCH<sub>3</sub>= 2-hydroxy-3-methoxybenzaldehyde
- d) H<sub>2</sub>L = 2-(((2-hydroxy-3-methoxybenzyl)imino)methyl)-4-methoxyphenol
- e) H<sub>2</sub>valdien = *N*1,*N*3-bis(3-methoxysalicylidene)diethylenetriamine)
- f) H<sub>2</sub>L=*N*<sub>1</sub>,*N*<sub>3</sub>-bis(4-chlorosalicyladehyde)diethylenetriamine
- g) LH<sub>3</sub> = (*1E,3E*)-2-hydroxy-5-methylisophthalaldehyde dioxime, Hdbm = dibenzoylmethane
- h) H<sub>2</sub>L<sub>1</sub>=*N*<sub>1</sub>,*N*<sub>3</sub>-bis(salicylaldehyde)diethylenetriamine
- i) HMq = 2-methyl-8-hydroxyquinoline, acac = acetylacetone
- j) DMOP = 2,6-dimethoxyphenol , DBM = dibenzoylmethane



## Supporting Information

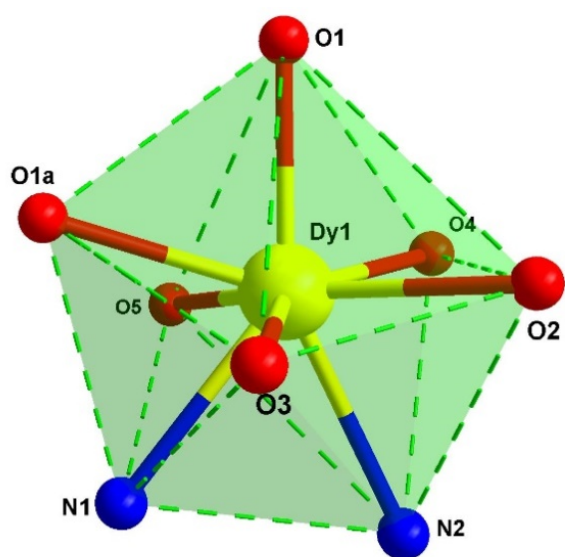

**Figure S1.** Distorted Trigonal Dodecahedron Geometry

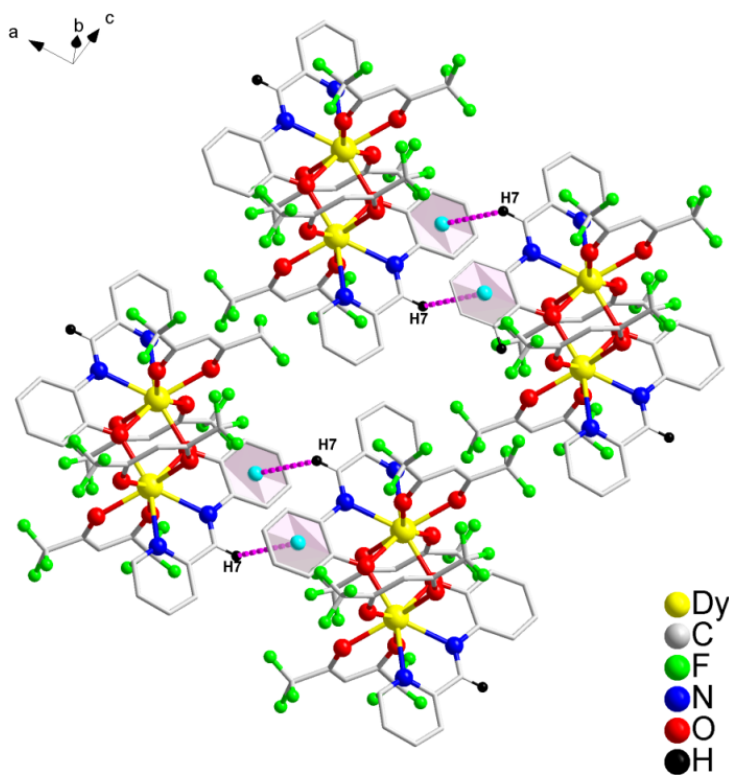

**Figure S2.** Supramolecular one-dimensional Zigzag Chain for **1**

## Supporting Information

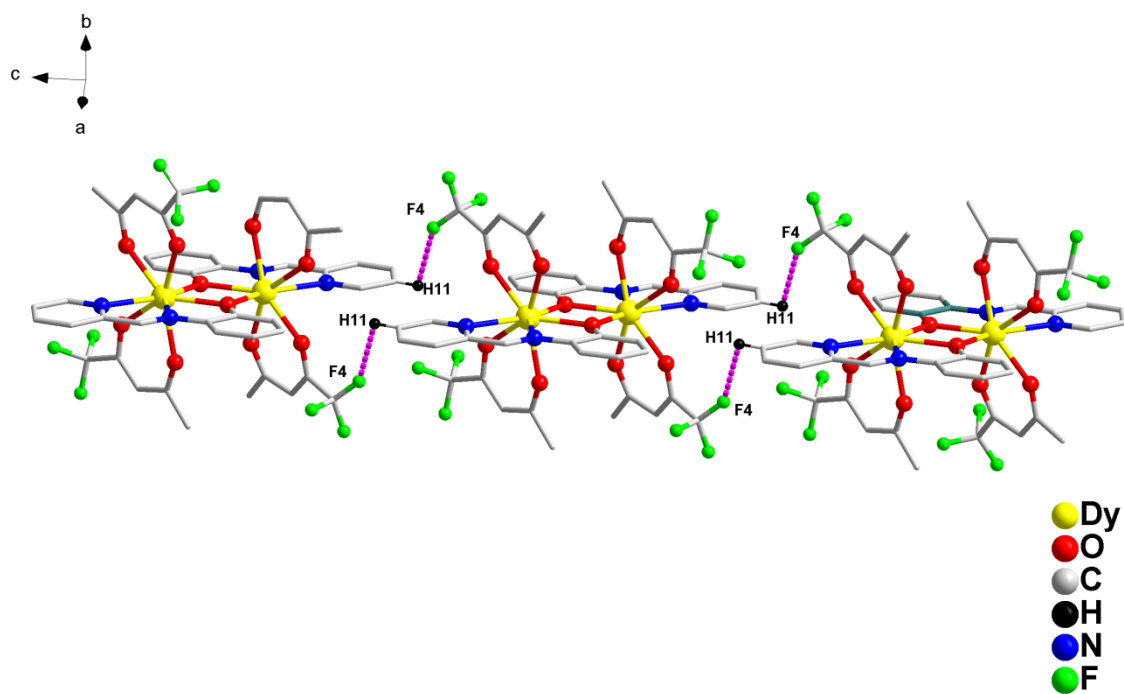

**Figure S3.** Supramolecular Interaction C-H...F and C-H... $\pi$  interactions for **2**

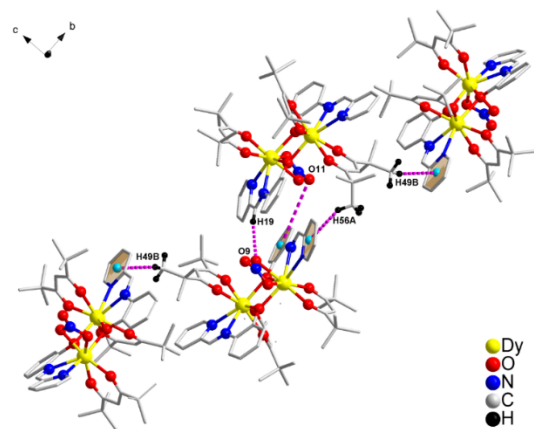

**Figure S4.** Supramolecular interaction for **3**.

## Supporting Information

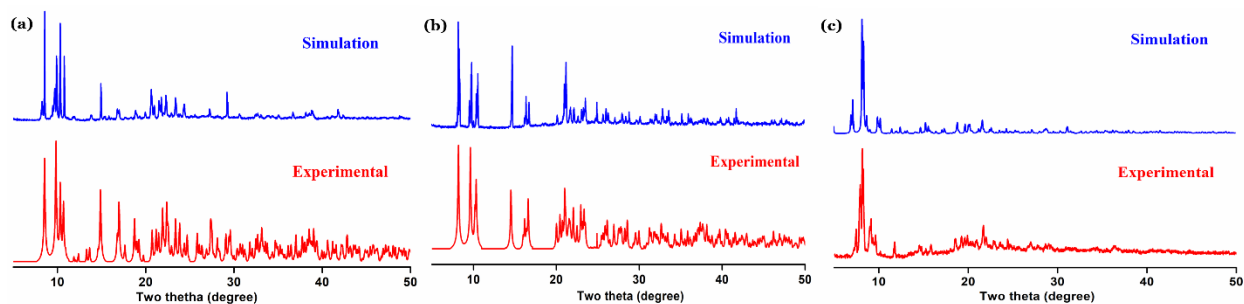

**Figure S5.** Experimental PXRD patterns and simulated patterns generated from single crystal X-ray diffraction data for complexes 1(a), 2 (b) and 3 (c).

Complex 1

Complex 2

Complex 3

**Figure S6.** TGA of complexes 1, 2 and 3.

## Supporting Information

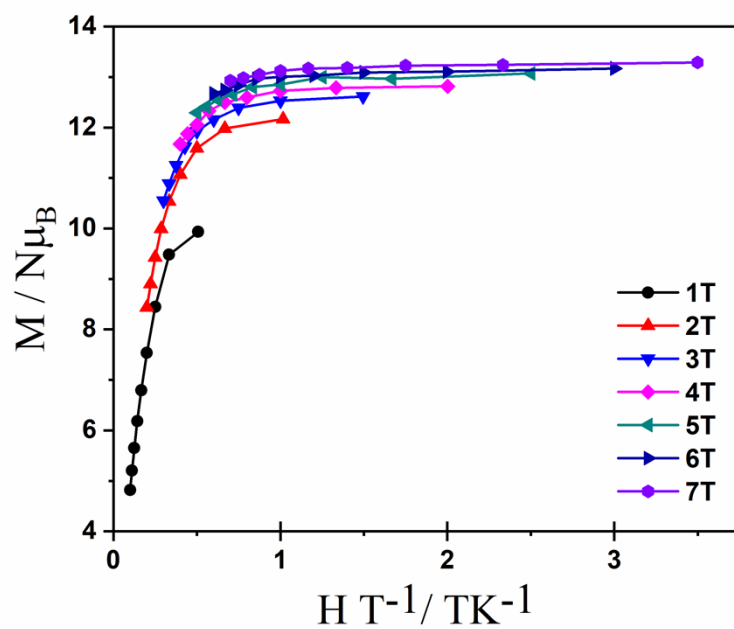

**Figure S7.** Temperature dependence of the magnetization of **1** at different fields.

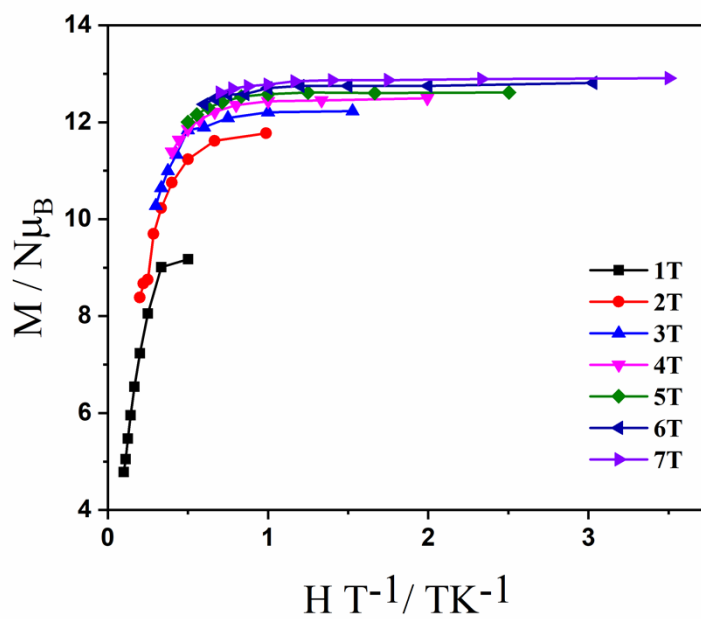

## Supporting Information

**Figure S8.** Temperature dependence of the magnetization of **2** at different fields.

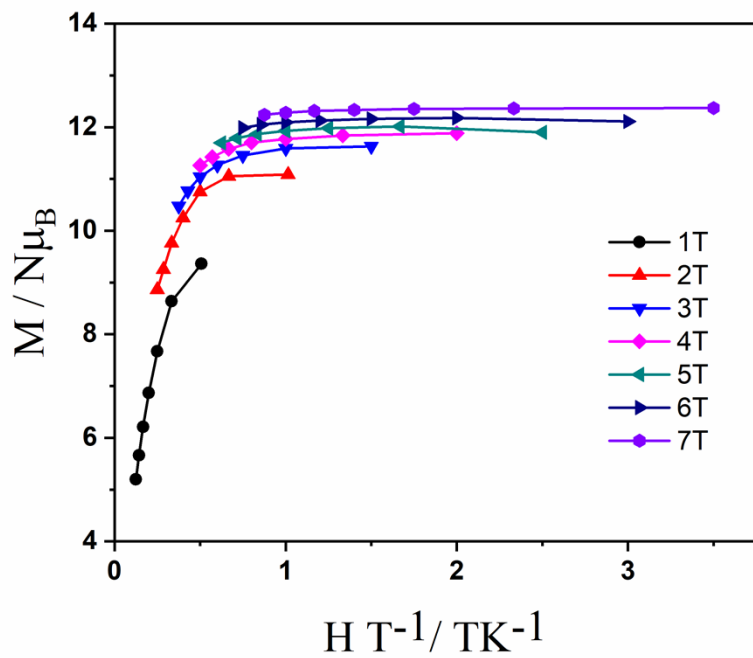

**Figure S9.** Temperature dependence of the magnetization of **3** at different fields.

## Supporting Information

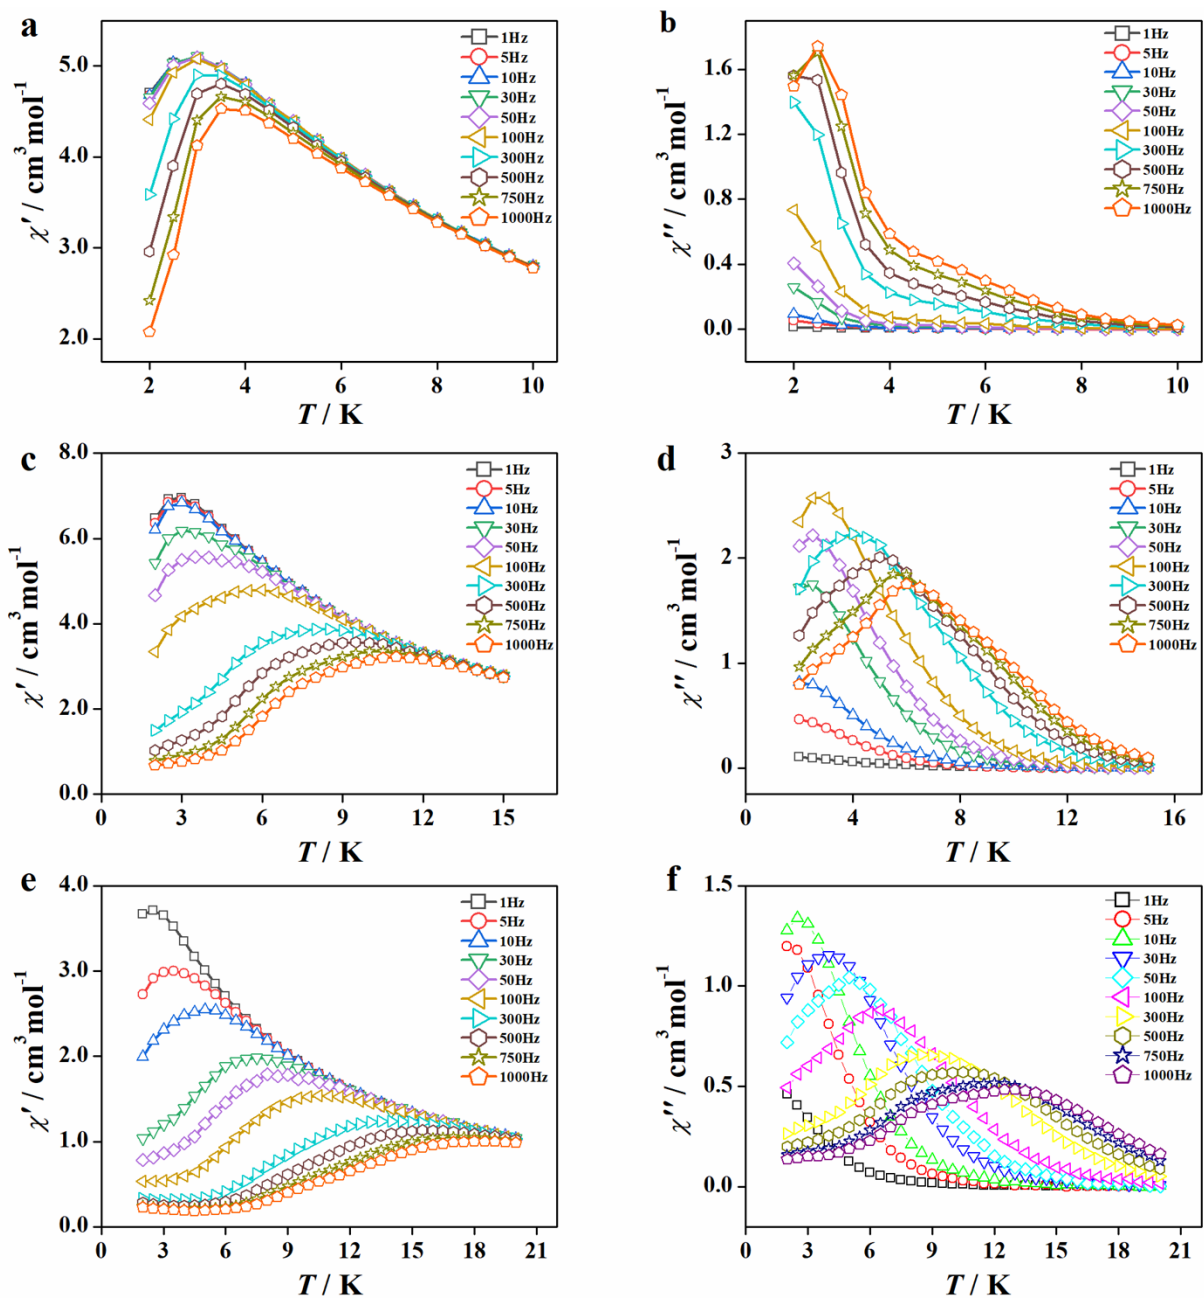

**Figure S10.** Temperature dependence of the in-phase (left) and out-of-phase (right) ac susceptibilities at the indicated frequency range for complexes **1–3** respectively under the zero field. Plots a and b for **1**, plots c and d for **2**, plots e and f for **3** respectively.

## Supporting Information

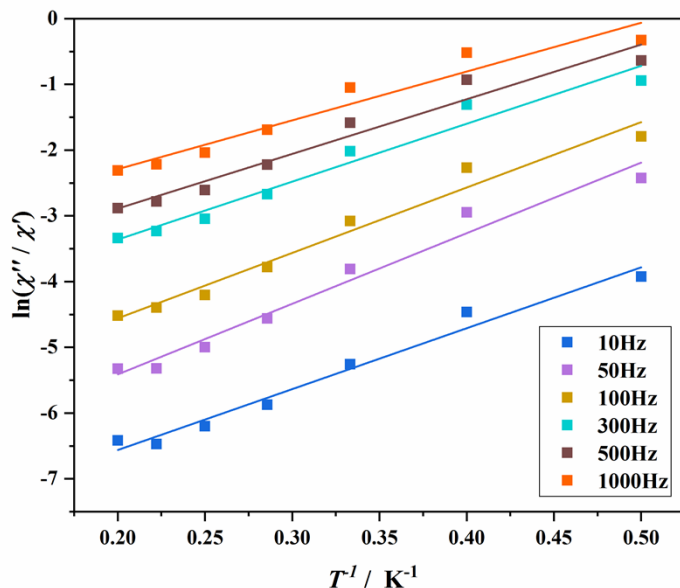

**Figure S11.** Plots of  $\ln(\chi''/\chi')$  versus  $1/T$  for **1**. The solid line represents the fitting results.

**Table S7.** Best fitted parameters ( $\chi_T$ ,  $\chi_s$ ,  $\tau$  and  $\alpha$ ) with the extended Debye model for complex **2** in the temperature range 2-12 K.

| T / K | $\chi_s / \text{cm}^3 \text{mol}^{-1}$ | $\chi_T / \text{cm}^3 \text{mol}^{-1}$ | $\tau / \text{s}$ | $\alpha$     | Residual     |
|-------|----------------------------------------|----------------------------------------|-------------------|--------------|--------------|
| 2     | 0.350481E+00                           | 0.665958E+01                           | 0.128883E-02      | 0.163959E+00 | 0.607703E-01 |
| 3     | 0.280499E+00                           | 0.630014E+01                           | 0.891005E-03      | 0.166752E+00 | 0.107417E+00 |
| 4     | 0.394313E+00                           | 0.606689E+01                           | 0.163415E-02      | 0.162261E+00 | 0.517652E-01 |
| 5     | 0.168174E+00                           | 0.572827E+01                           | 0.549796E-03      | 0.195841E+00 | 0.125834E+00 |
| 6     | 0.861614E-01                           | 0.520035E+01                           | 0.317335E-03      | 0.224695E+00 | 0.184454E+00 |
| 7     | 0.973595E-08                           | 0.479211E+01                           | 0.172517E-03      | 0.329566E+00 | 0.885052E+00 |
| 8     | 0.720337E+00                           | 0.429516E+01                           | 0.152362E-03      | 0.182583E+00 | 0.111876E+00 |
| 9     | 0.109531E+01                           | 0.392707E+01                           | 0.118928E-03      | 0.125894E+00 | 0.364341E-01 |
| 10    | 0.131191E+01                           | 0.361159E+01                           | 0.884013E-04      | 0.777668E-01 | 0.860003E-02 |
| 11    | 0.998760E-08                           | 0.343371E+01                           | 0.117237E-04      | 0.423714E+00 | 0.600370E+00 |
| 12    | 0.389307E+00                           | 0.311832E+01                           | 0.212144E-04      | 0.103405E+00 | 0.896909E-02 |

## Supporting Information

**Table S8.** Best fitted parameters ( $\chi_T$ ,  $\chi_S$ ,  $\tau$  and  $\alpha$ ) with the extended Debye model for complex **3** in the temperature range 2-12 K.

| T / K | $\chi_S / \text{cm}^3 \text{mol}^{-1}$ | $\chi_T / \text{cm}^3 \text{mol}^{-1}$ | $\tau / \text{s}$ | $\alpha$     | Residual     |
|-------|----------------------------------------|----------------------------------------|-------------------|--------------|--------------|
| 2     | 0.182473E+00                           | 0.373421E+01                           | 0.120052E-01      | 0.217182E+00 | 0.528326E-01 |
| 3     | 0.213776E+00                           | 0.370381E+01                           | 0.167642E-01      | 0.246978E+00 | 0.675996E-01 |
| 4     | 0.161974E+00                           | 0.341734E+01                           | 0.793087E-02      | 0.196216E+00 | 0.385585E-01 |
| 5     | 0.142261E+00                           | 0.303111E+01                           | 0.492711E-02      | 0.183860E+00 | 0.244681E-01 |
| 6     | 0.127306E+00                           | 0.270785E+01                           | 0.301886E-02      | 0.180590E+00 | 0.226791E-01 |
| 7     | 0.117925E+00                           | 0.243810E+01                           | 0.187997E-02      | 0.187323E+00 | 0.263958E-01 |
| 8     | 0.130859E+00                           | 0.221769E+01                           | 0.121461E-02      | 0.191449E+00 | 0.332745E-01 |
| 9     | 0.172797E+00                           | 0.202096E+01                           | 0.830336E-03      | 0.180391E+00 | 0.314681E-01 |
| 10    | 0.329506E-14                           | 0.361752E+01                           | 0.286170E-01      | 0.775504E+00 | 0.541527E+01 |
| 11    | 0.254338E+00                           | 0.171447E+01                           | 0.429667E-03      | 0.144991E+00 | 0.199198E-01 |
| 12    | 0.189065E-07                           | 0.222463E+01                           | 0.504246E-03      | 0.752444E+00 | 0.293394E+01 |

### Computational Details

All the calculations were carried out on the X-ray crystal structure using the MOLCAS 8.0 suite of programs.<sup>23</sup> In order to compute the magnetic property of individual Dy centres, the neighboring Dy ions were replaced by a diamagnetic closed-shell Lu<sup>3+</sup>. CASSCF/RASSCF, CASPT2, and multistate CASPT2 were performed to extract the Spin Hamiltonian parameters in the complexes.<sup>24-28</sup> All the calculations were performed using an ANO-RCC type basis set<sup>29</sup>. The following contractions were used :

Dy/Lu..... 7s6p4d2f.

C, N, O, F..... 3s2p.

H.....2s.

The electronic configuration of Dy(III) is 4f<sup>9</sup>, which possesses a ground state term of <sup>6</sup>H<sub>15/2</sub>. The active space include 4f shell of Dy<sup>3+</sup> ion: CAS (9,7), i.e., nine electrons in the seven f-orbitals of



## Supporting Information

Dy(III). We have computed 21 Spin Free roots of sextate using this active space then we have computed 126 roots of Spin Orbit states by introducing RASSI-SO module<sup>30</sup>. To better understanding of g-tensor orientation, LoProp charges were also computed. In the next step, we took these spin-orbit states in the SINGLE\_ANISO module of MOLCAS<sup>30</sup> to compute the g-values, crystal field parameters, wavefunction decomposition analysis, and transition magnetic moments of individual Dy(III) ions. Using the SINGLE\_ANISO module, we computed the g-tensor associated with eight low-lying KDs for the three complexes. Using the SINGLE\_ANISO code, we computed the CF parameters and constructed the ab initio blockade barrier by computing the transversal magnetic moment between each KDs to analyse the nature of magnetic relaxation.

The Cholesky decomposition for two-electron integrals was adapted to reduce the storage efficiency. The exchange spectrum (dipolar and exchange contributions), along with the magnetic properties of the dinuclear compound, was simulated using POLY\_ANISO code based on obtained results from the ab initio calculations. The POLY\_ANISO code has been successfully used to simulate the magnetic properties of highly anisotropic polynuclear complexes.<sup>31-35</sup>

**Table S9.** Calculated energy spectrum, g tensors, and the  $\Phi$  and  $\theta$  angles computed for complex **1**. Here Dy(1a) and Dy(1b) represent the two different Dy(III) sites present in complex **1**. The  $\Phi$  and  $\theta$  angles are described in Scheme 3.

| Dy ions | Kramers doublet | Energy (cm <sup>-1</sup> ) | $g_x$ | $g_y$ | $g_z$  | $\Phi$ (°) | $\theta$ (°) |
|---------|-----------------|----------------------------|-------|-------|--------|------------|--------------|
| Dy(1a)  | 1               | 0.0                        | 0.247 | 0.777 | 16.660 | -          | 62.5         |
| Dy(1b)  | 1               | 0.0                        | 0.246 | 0.777 | 16.680 | -          | 117.3        |

## Supporting Information

|        |   |       |       |       |        |       |       |
|--------|---|-------|-------|-------|--------|-------|-------|
| Dy(1a) | 2 | 29.7  | 0.049 | 0.807 | 15.225 | 141.7 | 79.8  |
| Dy(1b) | 2 | 29.7  | 0.047 | 0.804 | 15.233 | 141.8 | 100.8 |
| Dy(1a) | 3 | 79.0  | 1.452 | 4.268 | 15.139 | 106.8 | 76.7  |
| Dy(1b) | 3 | 79.0  | 1.450 | 4.272 | 15.150 | 97.4  | 144.1 |
| Dy(1a) | 4 | 110.9 | 9.477 | 5.910 | 1.995  | 100.9 | 91.3  |
| Dy(1b) | 4 | 110.9 | 9.499 | 5.912 | 2.002  | 100.9 | 88.7  |
| Dy(1a) | 5 | 144.9 | 7.899 | 5.663 | 0.906  | 78.8  | 80.2  |
| Dy(1b) | 5 | 144.9 | 7.913 | 5.656 | 0.911  | 78.8  | 99.8  |
| Dy(1a) | 6 | 159.2 | 2.546 | 5.172 | 12.521 | 25.5  | 56.1  |
| Dy(1b) | 6 | 159.2 | 2.542 | 5.179 | 12.542 | 25.5  | 123.9 |
| Dy(1a) | 7 | 329.6 | 0.132 | 0.457 | 17.795 | 53.7  | 50.9  |
| Dy(1b) | 7 | 329.6 | 0.130 | 0.459 | 17.804 | 53.7  | 129.0 |
| Dy(1a) | 8 | 348.9 | 0.100 | 0.581 | 18.043 | 56.2  | 49.4  |
| Dy(1b) | 8 | 348.9 | 0.098 | 0.580 | 18.065 | 56.2  | 130.7 |

**Table S10.** Calculated energy spectrum, g tensors, and the  $\Phi$  and  $\theta$  angles computed for complex **2**. Here Dy(1a) and Dy(1b) represent the two different Dy(III) sites present in complex **2**. The  $\Phi$  and  $\theta$  angles are described in Scheme 3.

| Dy ions | Kramers doublet | Energy (cm <sup>-1</sup> ) | g <sub>x</sub> | g <sub>y</sub> | g <sub>z</sub> | $\Phi$ (°) | $\theta$ (°) |
|---------|-----------------|----------------------------|----------------|----------------|----------------|------------|--------------|
| Dy(1a)  | 1               | 0.0                        | 0.489          | 1.446          | 18.366         | -          | 111.9        |
| Dy(1b)  | 1               | 0.0                        | 0.489          | 1.444          | 18.333         | -          | 68.1         |
| Dy(1a)  | 2               | 42.8                       | 3.031          | 4.587          | 11.362         | 29.2       | 102.2        |
| Dy(1b)  | 2               | 42.8                       | 3.024          | 4.586          | 11.340         | 29.2       | 77.9         |
| Dy(1a)  | 3               | 75.7                       | 2.400          | 4.597          | 10.759         | 68.1       | 168.1        |
| Dy(1b)  | 3               | 75.7                       | 2.402          | 4.587          | 10.762         | 68.1       | 12.0         |
| Dy(1a)  | 4               | 110.6                      | 0.418          | 1.779          | 13.564         | 91.9       | 155.3        |
| Dy(1b)  | 4               | 110.6                      | 0.416          | 1.770          | 13.564         | 91.8       | 24.6         |

## Supporting Information

|        |   |       |       |       |        |       |       |
|--------|---|-------|-------|-------|--------|-------|-------|
| Dy(1a) | 5 | 131.0 | 0.820 | 1.280 | 12.126 | 87.4  | 154.9 |
| Dy(1b) | 5 | 131.0 | 0.811 | 1.280 | 12.123 | 87.4  | 25.1  |
| Dy(1a) | 6 | 200.3 | 0.131 | 0.209 | 16.445 | 57.8  | 67.6  |
| Dy(1b) | 6 | 200.3 | 0.131 | 0.208 | 16.416 | 57.9  | 112.5 |
| Dy(1a) | 7 | 301.6 | 0.001 | 0.087 | 19.048 | 106.2 | 135.0 |
| Dy(1b) | 7 | 301.6 | 0.001 | 0.086 | 19.047 | 106.1 | 45.0  |
| Dy(1a) | 8 | 367.2 | 0.018 | 0.067 | 19.387 | 74.0  | 129.7 |
| Dy(1b) | 8 | 367.2 | 0.018 | 0.067 | 19.368 | 73.9  | 50.3  |

**Table S11.** Calculated energy spectrum, g tensors, and the  $\Phi$  and  $\theta$  angles computed for complex **3**. Here Dy3(a) and Dy3(b) represent the two different Dy(III) sites present in complex **3**. The  $\Phi$  and  $\theta$  angles are described in Scheme 3.

| Dy ions | Kramers doublet | Energy (cm <sup>-1</sup> ) | $g_x$ | $g_y$ | $g_z$  | $\Phi$ (°) | $\theta$ (°) |
|---------|-----------------|----------------------------|-------|-------|--------|------------|--------------|
| Dy(1a)  | 1               | 0.0                        | 0.091 | 0.185 | 19.369 | -          | 53.4         |
| Dy(1b)  | 1               | 0.0                        | 0.068 | 0.150 | 19.428 | -          | 88.6         |
| Dy(1a)  | 2               | 41.8                       | 1.307 | 2.141 | 15.498 | 28.4       | 33.0         |
| Dy(1b)  | 2               | 149.9                      | 1.504 | 3.364 | 14.543 | 17.4       | 95.1         |
| Dy(1a)  | 3               | 82.0                       | 1.225 | 4.216 | 11.952 | 69.2       | 40.4         |
| Dy(1b)  | 3               | 226.4                      | 4.104 | 5.733 | 8.312  | 71.1       | 111.3        |
| Dy(1a)  | 4               | 151.1                      | 2.331 | 3.701 | 9.261  | 36.4       | 46.0         |
| Dy(1b)  | 4               | 301.8                      | 0.765 | 2.485 | 10.528 | 99.2       | 168.2        |
| Dy(1a)  | 5               | 203.3                      | 1.108 | 1.892 | 14.760 | 55.9       | 55.4         |
| Dy(1b)  | 5               | 353.4                      | 0.843 | 0.907 | 16.060 | 89.2       | 177.7        |
| Dy(1a)  | 6               | 227.1                      | 1.725 | 3.357 | 9.766  | 74.8       | 62.30        |
| Dy(1b)  | 6               | 440.2                      | 0.043 | 0.343 | 18.504 | 65.7       | 32.2         |
| Dy(1a)  | 7               | 272.4                      | 1.637 | 4.972 | 14.299 | 60.2       | 89.7         |
| Dy(1b)  | 7               | 462.34                     | 0.017 | 0.245 | 17.404 | 84.7       | 112.9        |

## Supporting Information

|        |   |       |       |       |        |      |       |
|--------|---|-------|-------|-------|--------|------|-------|
| Dy(1a) | 8 | 399.8 | 0.071 | 0.162 | 19.484 | 78.0 | 127.6 |
| Dy(1b) | 8 | 554.7 | 0.043 | 0.088 | 19.078 | 62.6 | 142.4 |

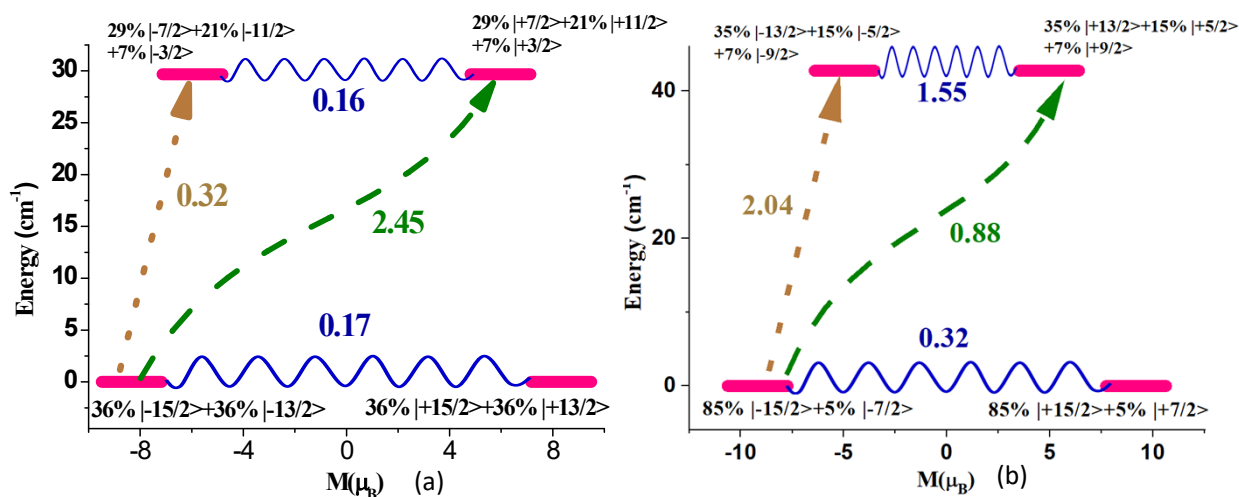

**Figure S12.** SINGLE\_ANISO computed magnetization blockade barrier for a) complex **1** and b) **2**. Here we have shown only one relaxation for only one centre as Dy1(b)/Dy2(b) relaxes in similar pattern due to centrosymmetric environment.

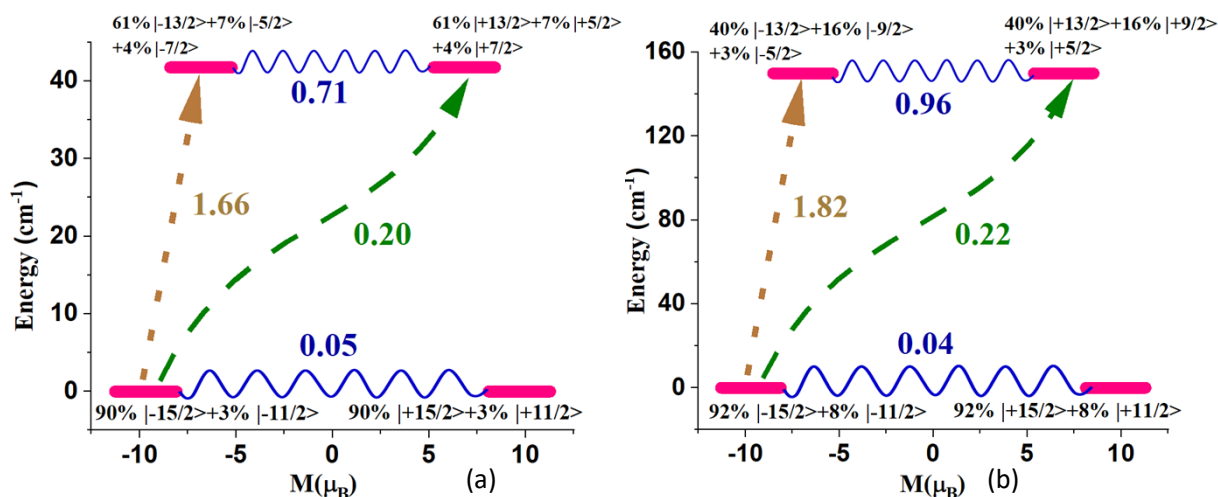

**Figure S13.** SINGLE\_ANISO computed magnetization blockade barrier for a) Dy3(a) and b) Dy3(b) based mononuclear fragments of **3**.

## Supporting Information

**Table S12.** SINGLE\_ANISO computed crystal field parameters for Dy<sup>III</sup> in complex **1**.

| k | q  | $B_k^q$          | $B_k^q$          |
|---|----|------------------|------------------|
|   |    | Dy1(a)           | Dy1(b)           |
| 2 | -2 | 2.42E-02         | 1.62E-02         |
|   | -1 | <b>-2.50E+00</b> | <b>-2.51E+00</b> |
|   | 0  | <b>-4.40E-01</b> | <b>-4.41E-01</b> |
|   | 1  | -1.54E-01        | -1.58E-01        |
|   | 2  | <b>1.79E+00</b>  | <b>1.79E+00</b>  |
| 4 | -4 | -3.70E-05        | -8.08E-05        |
|   | -3 | -7.28E-02        | -7.26E-02        |
|   | -2 | 1.05E-04         | -2.11E-07        |
|   | -1 | 3.04E-02         | 3.05E-02         |
|   | 0  | -3.45E-03        | -3.44E-03        |
|   | 1  | 4.52E-03         | 4.65E-03         |
|   | 2  | 1.32E-02         | 1.31E-02         |
|   | 3  | 3.94E-03         | 3.40E-03         |
|   | 4  | -8.14E-03        | -8.20E-03        |
| 6 | -6 | -1.54E-06        | -2.36E-06        |
|   | -5 | -1.24E-04        | -1.19E-04        |
|   | -4 | -3.57E-06        | -4.58E-06        |
|   | -3 | 3.11E-05         | 3.43E-05         |
|   | -2 | -9.76E-06        | -9.00E-06        |
|   | -1 | 2.62E-04         | 2.62E-04         |
|   | 0  | 2.46E-05         | 2.48E-05         |
|   | 1  | -6.28E-05        | -6.36E-05        |
|   | 2  | -1.44E-04        | -1.43E-04        |
|   | 3  | 4.32E-05         | 3.96E-05         |
|   | 4  | -4.35E-05        | -4.43E-05        |

## Supporting Information

|  |   |           |           |
|--|---|-----------|-----------|
|  | 5 | 3.98E-05  | 3.70E-05  |
|  | 6 | -1.07E-05 | -1.05E-05 |

## Supporting Information

**Table S13.** SINGLE\_ANISO computed crystal field parameters for the Dy<sup>III</sup> in complex **2**.

| k | q  | $B_k^q$          | $B_k^q$          |
|---|----|------------------|------------------|
|   |    | Dy2(a)           | Dy2(b)           |
| 2 | -2 | <b>5.93E-01</b>  | <b>5.96E-01</b>  |
|   | -1 | <b>-1.44E+00</b> | <b>-1.43E+00</b> |
|   | 0  | <b>-1.09E+00</b> | <b>-1.09E+00</b> |
|   | 1  | <b>2.46E-01</b>  | <b>2.37E-01</b>  |
|   | 2  | <b>6.97E-01</b>  | <b>6.86E-01</b>  |
| 4 | -4 | -1.27E-02        | -1.28E-02        |
|   | -3 | -5.13E-02        | -5.07E-02        |
|   | -2 | 3.06E-03         | 3.10E-03         |
|   | -1 | 1.70E-02         | 1.72E-02         |
|   | 0  | -1.28E-03        | -1.29E-03        |
|   | 1  | 1.25E-02         | 1.23E-02         |
|   | 2  | 6.65E-03         | 6.68E-03         |
|   | 3  | -1.85E-02        | -1.84E-02        |
|   | 4  | -3.52E-02        | -3.53E-02        |
| 6 | -6 | -2.07E-05        | -2.03E-05        |
|   | -5 | 3.08E-04         | 3.12E-04         |
|   | -4 | 1.96E-04         | 1.97E-04         |
|   | -3 | 4.18E-04         | 4.12E-04         |
|   | -2 | -2.77E-05        | -2.88E-05        |
|   | -1 | -1.17E-04        | -1.17E-04        |
|   | 0  | -9.34E-07        | -1.01E-06        |
|   | 1  | -1.42E-04        | -1.45E-04        |
|   | 2  | -5.15E-06        | -5.76E-06        |
|   | 3  | -8.84E-06        | -1.85E-05        |
|   | 4  | -1.10E-04        | -1.09E-04        |

## Supporting Information

|  |   |           |           |
|--|---|-----------|-----------|
|  | 5 | -1.68E-04 | -1.86E-04 |
|  | 6 | 5.89E-06  | 5.97E-06  |

**Table S14.** SINGLE\_ANISO computed crystal field parameters for the Dy<sup>III</sup> in complex **3**.

| k | q  | $B_k^q$          | $B_k^q$          |
|---|----|------------------|------------------|
|   |    | Dy3(a)           | Dy3(b)           |
| 2 | -2 | -8.08E-02        | <b>-1.38E-01</b> |
|   | -1 | <b>1.29E+00</b>  | <b>-7.26E-01</b> |
|   | 0  | <b>-1.21E+00</b> | <b>-1.91E+00</b> |
|   | 1  | <b>-1.05E+00</b> | <b>1.54E+00</b>  |
|   | 2  | <b>1.22E+00</b>  | <b>2.53E+00</b>  |
| 4 | -4 | -1.34E-02        | 1.01E-02         |
|   | -3 | 4.17E-02         | 2.24E-03         |
|   | -2 | -9.76E-03        | 4.73E-03         |
|   | -1 | -9.08E-03        | 4.05E-03         |
|   | 0  | -2.98E-03        | -4.88E-03        |
|   | 1  | -7.44E-04        | -7.03E-03        |
|   | 2  | -1.30E-02        | 2.62E-02         |
|   | 3  | -3.33E-02        | 1.07E-02         |
|   | 4  | 2.43E-02         | -1.30E-02        |
| 6 | -6 | -2.52E-04        | 2.82E-04         |
|   | -5 | 6.11E-06         | 2.57E-04         |
|   | -4 | 1.83E-04         | -1.79E-05        |
|   | -3 | 1.82E-04         | -8.00E-06        |
|   | -2 | -2.23E-05        | -1.67E-04        |
|   | -1 | -4.30E-05        | 5.05E-05         |
|   | 0  | 2.07E-05         | -3.59E-06        |
|   | 1  | 7.86E-05         | 2.54E-05         |



## Supporting Information

|  |   |           |           |
|--|---|-----------|-----------|
|  | 2 | 7.31E-05  | 1.47E-05  |
|  | 3 | 1.06E-04  | 1.31E-04  |
|  | 4 | 1.04E-04  | 1.59E-04  |
|  | 5 | -4.08E-04 | -8.79E-05 |
|  | 6 | 6.03E-05  | 2.37E-04  |

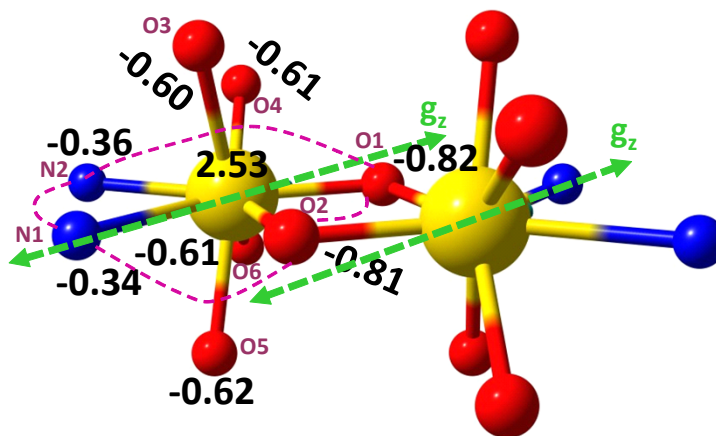

**Figure S14.** CASSCF computed LoProp charges on the Dy and first coordination sphere ligated atoms in complex 1.

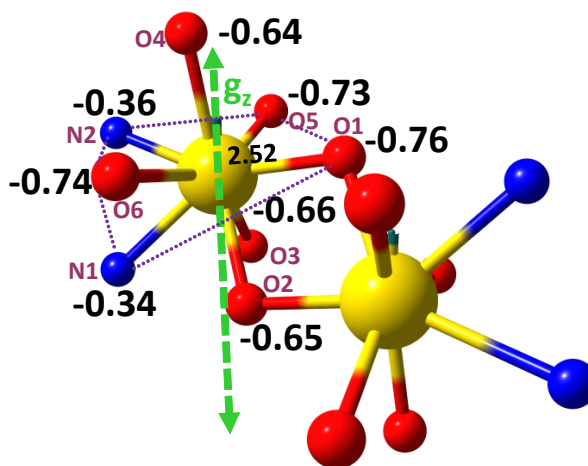

**Figure S15.** CASSCF computed LoProp charges on the Dy and first coordination sphere ligated atoms in complex 2.

## Supporting Information

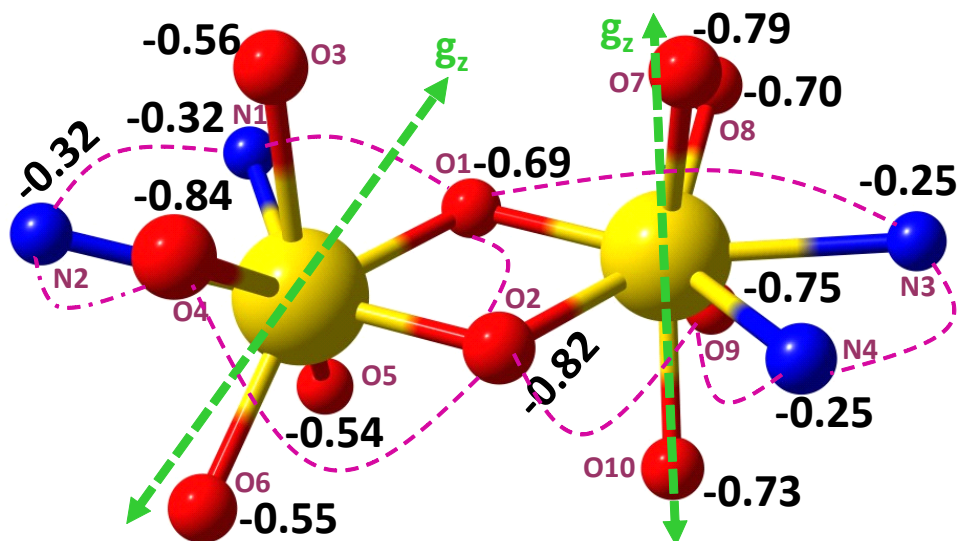

**Figure S16.** CASSCF computed LoProp charges on the Dy and first coordination sphere ligated atoms in complex **3**.

**Table S15.** CASSCF computed LoProp charges per central atom and first coordination sphere ligand atoms in the ground state of complexes **1-3**.

|                  | Atoms         | <b>1</b> | Atoms         | <b>2</b> | Atoms  | <b>3</b> | Atoms  | <b>3</b> |
|------------------|---------------|----------|---------------|----------|--------|----------|--------|----------|
|                  | Dy(1a)/Dy(1b) | 2.53     | Dy(1a)/Dy(1b) | 2.52     | Dy(1a) |          | Dy(1b) |          |
| Hard Plane atoms | O3            | -0.60    | O1            | -0.76    | O3     | -0.56    | O1     | -0.78    |
|                  | O4            | -0.61    | O5            | -0.73    | O6     | -0.55    | O2     | -0.81    |
|                  | O5            | -0.62    | N2            | -0.36    | O5     | -0.54    | O9     | -0.75    |
|                  | O6            | -0.61    | O6            | -0.74    |        |          | N4     | -0.25    |
|                  |               |          | N1            | -0.34    |        |          | N3     | -0.25    |
| Average          |               | -0.61    |               | -0.58    |        | -0.55    |        | -0.57    |
| Axial            | O1            | -0.82    | O4            | -0.64    | O1     | -0.69    | O7     | -0.79    |

## Supporting Information

|                    |    |       |    |       |    |       |     |       |
|--------------------|----|-------|----|-------|----|-------|-----|-------|
| coordination atoms | O2 | -0.81 | O3 | -0.66 | O2 | -0.82 | O8  | -0.70 |
|                    | N1 | -0.34 | O2 | -0.65 | N2 | -0.32 | O10 | -0.73 |
|                    | N2 | -0.36 |    |       | O4 | -0.84 |     |       |
|                    |    |       |    |       | N1 | -0.32 |     |       |
| Average            |    | -0.58 |    | -0.65 |    | -0.60 |     | -0.74 |

**Table S16.** SINGLE\_ANISO computed wave function decomposition analysis for Dy1 and Dy2 centres in complex **1**. The major dominating values are kept in bold.

---

**$\pm mJ$**  wave function decomposition analysis **Dy@1**

KD1 **37.63%**  $|\pm 13/2\rangle$  + **37.08%**  $|\pm 15/2\rangle$  + 16.29%  $|\pm 9/2\rangle$

KD2 **30.65%**  $|\pm 7/2\rangle$  + 21.97%  $|\pm 11/2\rangle$  + 16.97%  $|\pm 15/2\rangle$  + 12.08%  $|\pm 9/2\rangle$

KD3 **48.33%**  $|\pm 1/2\rangle$  + 19.68%  $|\pm 3/2\rangle$  + 16.06%  $|\pm 5/2\rangle$

KD4 **23.45%**  $|\pm 3/2\rangle$  + 22.15%  $|\pm 1/2\rangle$  + 15.25%  $|\pm 15/2\rangle$  + 12.57%  $|\pm 5/2\rangle$  + 10.08%  $|\pm 11/2\rangle$

KD5 **33.49%**  $|\pm 3/2\rangle$  + 20.05%  $|\pm 13/2\rangle$  + 12.74%  $|\pm 5/2\rangle$

KD6 **23.95%**  $|\pm 13/2\rangle$  + 19.26%  $|\pm 15/2\rangle$  + 18.06%  $|\pm 1/2\rangle$  + 16.96%  $|\pm 11/2\rangle$  + 14.80%  $|\pm 5/2\rangle$

KD7 **34.27%**  $|\pm 7/2\rangle$  + 23.17%  $|\pm 11/2\rangle$  + 18.17%  $|\pm 5/2\rangle$  + 14.21%  $|\pm 9/2\rangle$

KD8 **41.39%**  $|\pm 9/2\rangle$  + 22.09%  $|\pm 7/2\rangle$  + 13.74%  $|\pm 5/2\rangle$

**$\pm mJ$**  wave function decomposition analysis **Dy@2**

KD1 **38.00%**  $|\pm 13/2\rangle$  + **36.78%**  $|\pm 15/2\rangle$  + 16.15%  $|\pm 9/2\rangle$

KD2 **30.61%**  $|\pm 7/2\rangle$  + 21.93%  $|\pm 11/2\rangle$  + 16.99%  $|\pm 15/2\rangle$  + 12.14%  $|\pm 9/2\rangle$

KD3 **48.20%**  $|\pm 1/2\rangle$  + 19.78%  $|\pm 3/2\rangle$  + 16.07%  $|\pm 5/2\rangle$

KD4 **23.16%**  $|\pm 3/2\rangle$  + 22.40%  $|\pm 1/2\rangle$  + 15.39%  $|\pm 15/2\rangle$  + 12.58%  $|\pm 5/2\rangle$  + 10.02%  $|\pm 11/2\rangle$

KD5 **33.72%**  $|\pm 3/2\rangle$  + 20.06%  $|\pm 13/2\rangle$  + 12.56%  $|\pm 5/2\rangle$

KD6 **23.65%**  $|\pm 13/2\rangle$  + 19.36%  $|\pm 15/2\rangle$  + 18.02%  $|\pm 1/2\rangle$  + 17.13%  $|\pm 11/2\rangle$  + 14.88%  $|\pm 5/2\rangle$

KD7 **34.08%**  $|\pm 7/2\rangle$  + 23.24%  $|\pm 11/2\rangle$  + 18.33%  $|\pm 5/2\rangle$  + 14.21%  $|\pm 9/2\rangle$

KD8 **41.41%**  $|\pm 9/2\rangle$  + 22.36%  $|\pm 7/2\rangle$  + 13.67%  $|\pm 5/2\rangle$

---

## Supporting Information

**Table S17.** SINGLE\_ANISO computed wave function decomposition analysis for Dy1 centre and Dy2 centre in complex **2**. The major dominating values are kept in bold.

| $\pm mJ$ | <i>wave function decomposition analysis Dy@1</i>                                                                                                                         |
|----------|--------------------------------------------------------------------------------------------------------------------------------------------------------------------------|
| KD1      | <b>84.47%</b> $ \pm 15/2\rangle$ + 6.25% $ \pm 7/2\rangle$                                                                                                               |
| KD2      | <b>46.20%</b> $ \pm 13/2\rangle$ + 18.41% $ \pm 5/2\rangle$ + 10.51% $ \pm 9/2\rangle$                                                                                   |
| KD3      | <b>24.46%</b> $ \pm 11/2\rangle$ + 17.35% $ \pm 13/2\rangle$ + 15.52% $ \pm 7/2\rangle$ + 13.02% $ \pm 3/2\rangle$                                                       |
| KD4      | <b>28.26%</b> $ \pm 1/2\rangle$ + 16.84% $ \pm 9/2\rangle$ + 16.07% $ \pm 11/2\rangle$ + 14.16% $ \pm 5/2\rangle$ + 10.74% $ \pm 3/2\rangle$                             |
| KD5      | <b>19.56%</b> $ \pm 7/2\rangle$ + 18.83% $ \pm 9/2\rangle$ + 18.21% $ \pm 3/2\rangle$ + 12.74% $ \pm 13/2\rangle$ + 11.64% $ \pm 11/2\rangle$ + 10.67% $ \pm 1/2\rangle$ |
| KD6      | <b>27.48%</b> $ \pm 11/2\rangle$ + 18.90% $ \pm 9/2\rangle$ + 16.65% $ \pm 13/2\rangle$ + 13.03% $ \pm 7/2\rangle$ + 12.87% $ \pm 5/2\rangle$                            |
| KD7      | <b>27.44%</b> $ \pm 1/2\rangle$ + 18.18% $ \pm 3/2\rangle$ + 17.17% $ \pm 7/2\rangle$ + 15.28% $ \pm 5/2\rangle$ + 14.31% $ \pm 5/2\rangle$                              |
| KD8      | <b>25.70%</b> $ \pm 5/2\rangle$ + 25.65% $ \pm 3/2\rangle$ + 17.41% $ \pm 7/2\rangle$ + 17.33% $ \pm 1/2\rangle$                                                         |
| $\pm mJ$ | <i>wave function decomposition analysis Dy@2</i>                                                                                                                         |
| KD1      | <b>84.47%</b> $ \pm 15/2\rangle$ + 6.26% $ \pm 7/2\rangle$                                                                                                               |
| KD2      | <b>46.16%</b> $ \pm 13/2\rangle$ + 18.40% $ \pm 5/2\rangle$ + 10.46% $ \pm 9/2\rangle$                                                                                   |
| KD3      | <b>24.33%</b> $ \pm 11/2\rangle$ + 17.33% $ \pm 13/2\rangle$ + 15.53% $ \pm 7/2\rangle$ + 12.91% $ \pm 3/2\rangle$                                                       |
| KD4      | <b>28.31%</b> $ \pm 1/2\rangle$ + 16.94% $ \pm 9/2\rangle$ + 16.02% $ \pm 11/2\rangle$ + 14.15% $ \pm 5/2\rangle$ + 10.70% $ \pm 3/2\rangle$                             |
| KD5      | <b>19.64%</b> $ \pm 7/2\rangle$ + 18.78% $ \pm 9/2\rangle$ + 18.35% $ \pm 3/2\rangle$ + 12.83% $ \pm 13/2\rangle$ + 11.58% $ \pm 11/2\rangle$ + 10.52% $ \pm 1/2\rangle$ |
| KD6      | <b>27.60%</b> $ \pm 11/2\rangle$ + 18.79% $ \pm 9/2\rangle$ + 16.65% $ \pm 13/2\rangle$ + 13.05% $ \pm 7/2\rangle$ + 12.87% $ \pm 5/2\rangle$                            |
| KD7      | <b>27.70%</b> $ \pm 1/2\rangle$ + 18.07% $ \pm 3/2\rangle$ + 17.05% $ \pm 7/2\rangle$ + 15.14% $ \pm 5/2\rangle$ + 14.34% $ \pm 5/2\rangle$                              |
| KD8      | <b>25.79%</b> $ \pm 5/2\rangle$ + 25.68% $ \pm 3/2\rangle$ + 17.47% $ \pm 7/2\rangle$ + 17.14% $ \pm 1/2\rangle$                                                         |

## Supporting Information

**Table S18.** SINGLE\_ANISO computed wave function decomposition analysis for Dy1 centre and Dy2 centre in complex **3**. The major dominating values are kept in bold.

| $\pm mJ$ | <i>wave function decomposition analysis Dy@1</i>                                                                                                                         |
|----------|--------------------------------------------------------------------------------------------------------------------------------------------------------------------------|
| KD1      | <b>91.73%</b> $ \pm 15/2\rangle$ + 3.35% $ \pm 11/2\rangle$                                                                                                              |
| KD2      | <b>66.13%</b> $ \pm 13/2\rangle$ + 10.69% $ \pm 5/2\rangle$                                                                                                              |
| KD3      | <b>29.23%</b> $ \pm 1/2\rangle$ + 27.51% $ \pm 3/2\rangle$ + 15.27% $ \pm 13/2\rangle$ + 10.99% $ \pm 11/2\rangle$                                                       |
| KD4      | <b>40.82%</b> $ \pm 11/2\rangle$ + 24.13% $ \pm 1/2\rangle$                                                                                                              |
| KD5      | <b>24.09%</b> $ \pm 9/2\rangle$ + 16.98% $ \pm 11/2\rangle$ + 15.14% $ \pm 5/2\rangle$ + 14.82% $ \pm 3/2\rangle$ + 12.52% $ \pm 7/2\rangle$                             |
| KD6      | <b>22.18%</b> $ \pm 3/2\rangle$ + 19.45% $ \pm 7/2\rangle$ + 18.20% $ \pm 9/2\rangle$ + 16.49% $ \pm 5/2\rangle$ + 10.07% $ \pm 11/2\rangle$                             |
| KD7      | <b>31.09%</b> $ \pm 7/2\rangle$ + 26.69% $ \pm 9/2\rangle$ + 23.87% $ \pm 5/2\rangle$                                                                                    |
| KD8      | <b>22.03%</b> $ \pm 1/2\rangle$ + 21.05% $ \pm 3/2\rangle$ + 19.96% $ \pm 5/2\rangle$ + 19.42% $ \pm 7/2\rangle$ + 12.20% $ \pm 9/2\rangle$                              |
| $\pm mJ$ | <i>wave function decomposition analysis Dy@2</i>                                                                                                                         |
| KD1      | <b>91.28%</b> $ \pm 15/2\rangle$ + 8.14% $ \pm 11/2\rangle$                                                                                                              |
| KD2      | <b>60.90%</b> $ \pm 13/2\rangle$ + 24.94% $ \pm 9/2\rangle$                                                                                                              |
| KD3      | <b>29.90%</b> $ \pm 7/2\rangle$ + 18.37% $ \pm 11/2\rangle$ + 14.99% $ \pm 13/2\rangle$ + 12.80% $ \pm 3/2\rangle$ + 10.56% $ \pm 5/2\rangle$ + 10.15% $ \pm 3/2\rangle$ |
| KD4      | <b>27.68%</b> $ \pm 5/2\rangle$ + 27.13% $ \pm 11/2\rangle$ + 12.65% $ \pm 3/2\rangle$                                                                                   |
| KD5      | <b>37.44%</b> $ \pm 1/2\rangle$ + 23.21% $ \pm 3/2\rangle$ + 12.93% $ \pm 9/2\rangle$ + 11.11% $ \pm 11/2\rangle$                                                        |
| KD6      | <b>20.84%</b> $ \pm 9/2\rangle$ + 19.67% $ \pm 7/2\rangle$ + 18.64% $ \pm 5/2\rangle$ + 14.44% $ \pm 3/2\rangle$ + 14.42% $ \pm 11/2\rangle$                             |
| KD7      | <b>36.18%</b> $ \pm 1/2\rangle$ + 26.68% $ \pm 3/2\rangle$ + 10.76% $ \pm 5/2\rangle$ + 10.51% $ \pm 9/2\rangle$                                                         |
| KD8      | <b>28.29%</b> $ \pm 7/2\rangle$ + 22.81% $ \pm 9/2\rangle$ + 20.80% $ \pm 5/2\rangle$ + 12.83% $ \pm 11/2\rangle$                                                        |

## Supporting Information

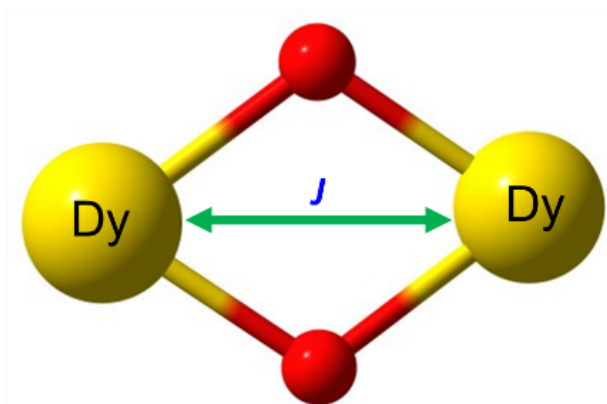

**Scheme S1.** Exchange model employed model Dy-Dy series (1-3)

$$\hat{H}_{\text{exch}} = -\hat{J} \hat{S}_{\text{Dy}} \hat{S}_{\text{Dy}}$$

The foregoing exchange matrix has been written on the basis of lowest spin-orbit multiplets on magnetic centres.

**Table S19.** BS-DFT computed energies of high-spin and broken-symmetry solution of complex M1 using  $H = -2JS_1S_2$  formalism.

| Solution | Energy (Eh)         | $\rho^{\text{Gd1}}$ | $\rho^{\text{Gd2}}$ | $\langle S^{*2} \rangle$ | $J$ (cm <sup>-1</sup> ) | $J$ value<br>Rescaled to<br>Dy <sup>III</sup> spin (= $J \times 25/49$ ) |
|----------|---------------------|---------------------|---------------------|--------------------------|-------------------------|--------------------------------------------------------------------------|
| HS       | -27593.884613148628 | 7.01                | 7.01                | 56.0109                  | -0.68                   | <b>-0.34</b>                                                             |
| BS1      | -27593.884681936219 | 7.01                | -7.01               | 7.0119                   |                         |                                                                          |

$J$  values are estimated using the following equation,

## Supporting Information

$$J = - \frac{E_{HS} - E_{BS}}{S_{HS}^2 - S_{BS}^2}$$

**Table S20.** BS-DFT computed energies of high-spin and broken-symmetry solution of complex M2 using  $H = -2JS_1S_2$  formalism.

| Solution | Energy (Eh)             | $\rho^{Gd1}$ | $\rho^{Gd2}$ | $\langle S^{*2} \rangle$ | J (cm <sup>-1</sup> ) | J value Rescaled to Dy <sup>III</sup> spin (= Jx25/49) |
|----------|-------------------------|--------------|--------------|--------------------------|-----------------------|--------------------------------------------------------|
| HS       | -<br>26403.516547281051 | 7.01         | 7.01         | 56.0109                  | -0.66                 | <b>-0.33</b>                                           |
| BS1      | -<br>26403.516611767995 | 7.01         | -7.01        | 7.0119                   |                       |                                                        |

*J* values are estimated using the following equation,

$$J = - \frac{E_{HS} - E_{BS}}{S_{HS}^2 - S_{BS}^2}$$

**Table S21.** BS-DFT computed energies of high-spin and broken-symmetry solution of complex M3 using  $H = -2JS_1S_2$  formalism.

| Solution | Energy (Eh)             | $\rho^{Gd1}$ | $\rho^{Gd2}$ | $\langle S^{*2} \rangle$ | J (cm <sup>-1</sup> ) | J value Rescaled to Dy <sup>III</sup> spin (= Jx25/49) |
|----------|-------------------------|--------------|--------------|--------------------------|-----------------------|--------------------------------------------------------|
| HS       | -<br>25854.682010876866 | 7.01         | 7.01         | 56.0120                  | -0.20                 | <b>-0.10</b>                                           |
| BS1      | -<br>25854.682033786190 | 7.01         | -7.01        | 7.0121                   |                       |                                                        |

*J* values are estimated using the following equation,

## Supporting Information

$$J = - \frac{E_{HS} - E_{BS}}{s_{HS}^2 - s_{BS}^2}$$

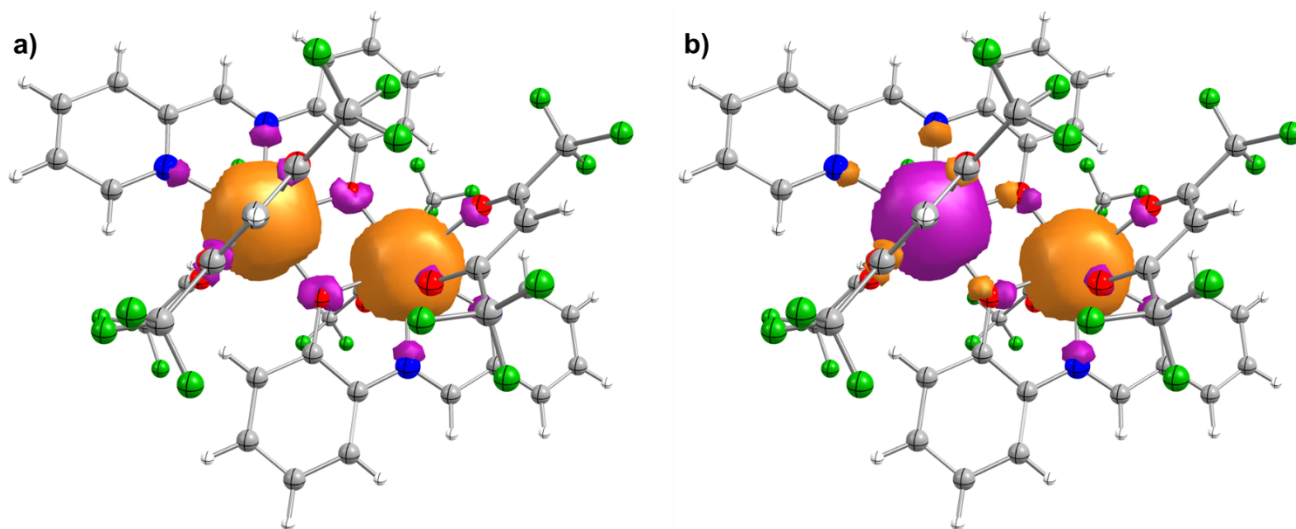

**Figure S17.** DFT calculated spin-density plot for the ground state ( $S=0$ ) of complex M1 (a) HS and (b) BS; the positive and negative spin densities are represented by orange and purple colour, respectively. The isodensity surface represented here corresponds to a value of  $0.001 \text{ e}^-/\text{bohr}^3$ .



## Supporting Information

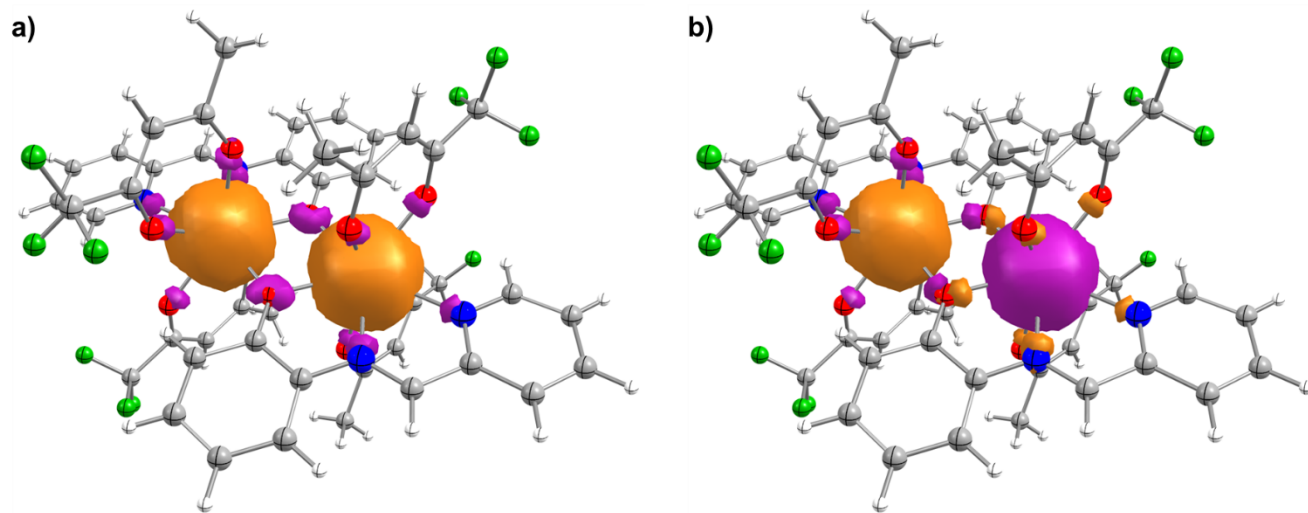

**Figure S18.** DFT calculated spin-density plot for the ground state ( $S=0$ ) of complex M2 (a) HS and (b) BS; the positive and negative spin densities are represented by orange and purple colour, respectively. The isodensity surface represented here corresponds to a value of  $0.001 \text{ e}^-/\text{bohr}^3$ .

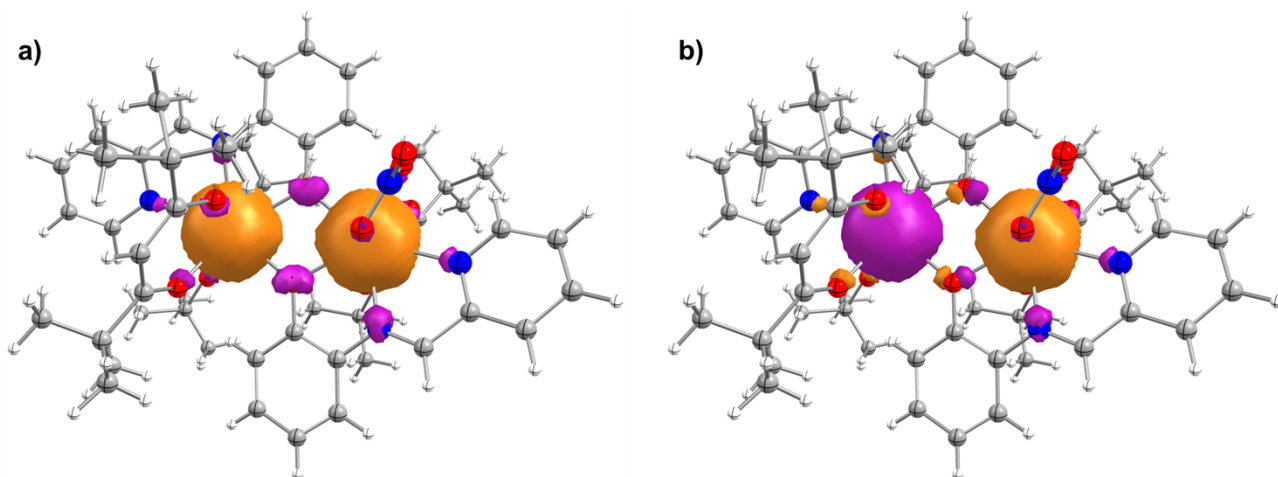

## Supporting Information

**Figure S19.** DFT calculated spin-density plot for the ground state ( $S = 0$ ) of complex M3 (a) HS and (b) BS; the positive and negative spin densities are represented by orange and purple colour, respectively. The isodensity surface represented here corresponds to a value of  $0.001 \text{ e}^-/\text{bohr}^3$ .

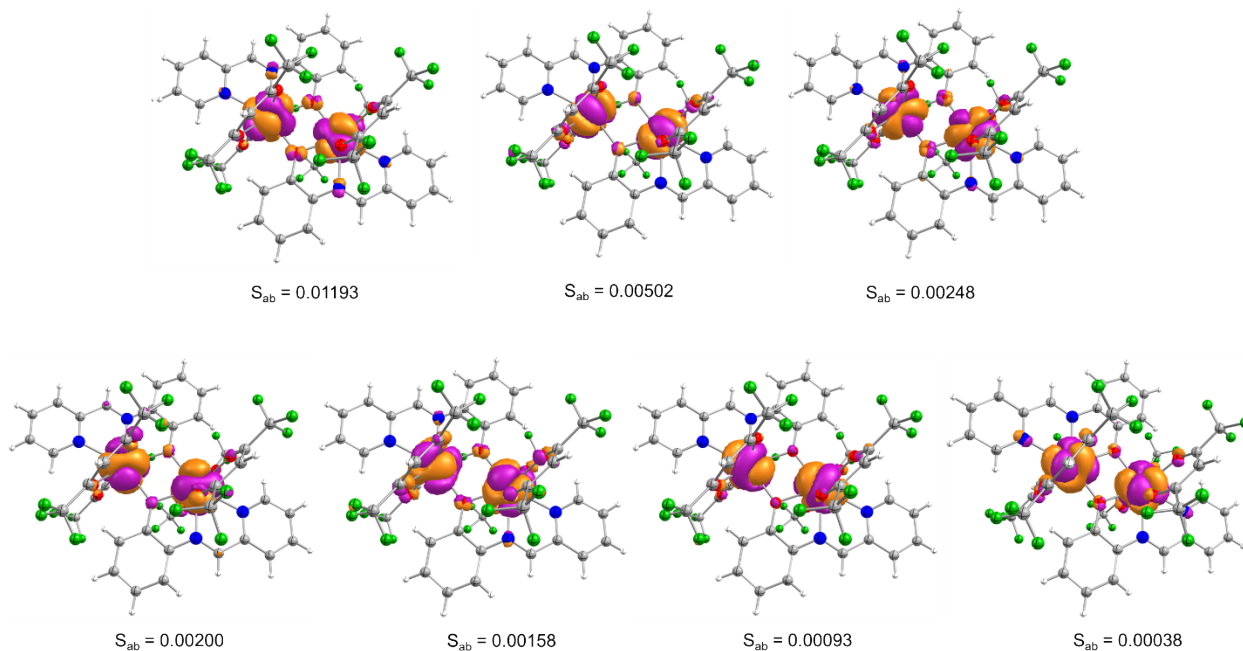

**Figure S20.** DFT calculated overlap integrals for complex M1. The isodensity surface represented here corresponds to a value of  $0.03 \text{ e}^-/\text{bohr}^3$ .

## Supporting Information

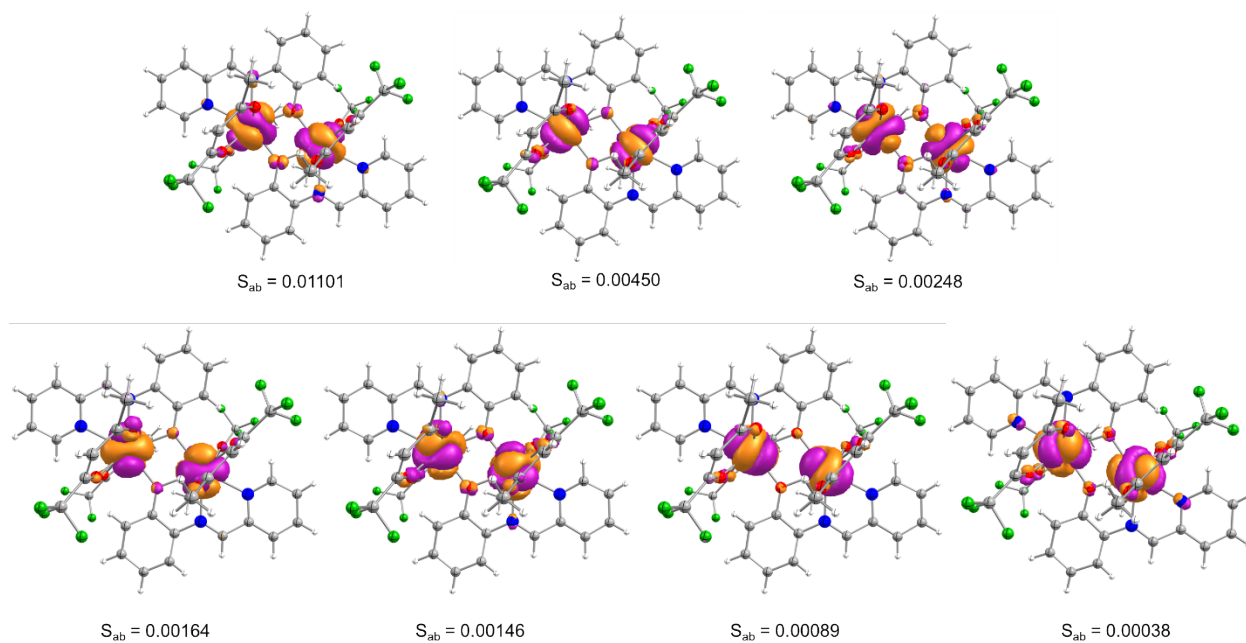

**Figure S21.** DFT calculated overlap integrals for complex M2. The isodensity surface represented here corresponds to a value of  $0.03 \text{ e}^-/\text{bohr}^3$ .

## Supporting Information

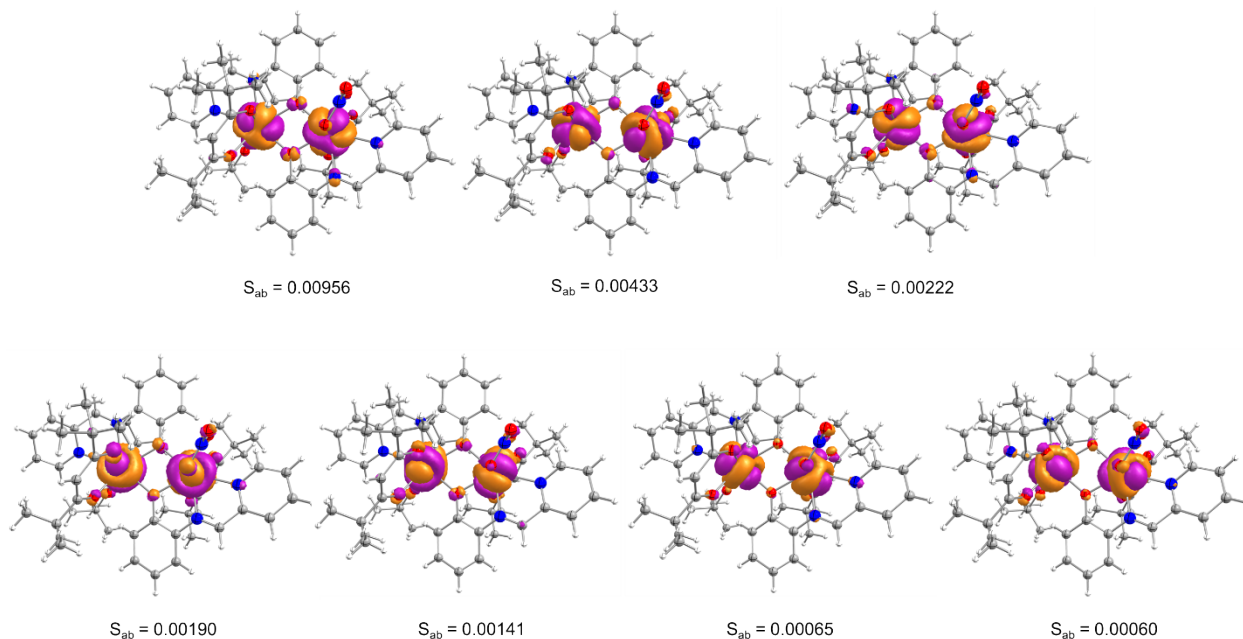

**Figure S22.** DFT calculated overlap integrals for complex M3. The isodensity surface represented here corresponds to a value of  $0.03 \text{ e}^-/\text{bohr}^3$ .

**Table S22.** Energies ( $\text{cm}^{-1}$ ), corresponding tunnel splitting ( $\Delta_{\text{tun}}$ ) and g tensors of the low-lying exchange doublet state in complex 1-3.

| Complex 1                  |                                      |        |          |                                      |         |
|----------------------------|--------------------------------------|--------|----------|--------------------------------------|---------|
| Energy of Exchange Doublet | $\Delta_{\text{tun}}/\text{cm}^{-1}$ | $g_z$  | Energy   | $\Delta_{\text{tun}}/\text{cm}^{-1}$ | $g_z$   |
| 0.0000                     |                                      | 0.024  | 31.87569 | 0.017                                | 30.143  |
| 0.0006                     | 0.0006                               |        | 31.89325 |                                      |         |
| 2.1756                     |                                      | 33.401 | 31.9820  | 0.013                                | 130.138 |
| 2.1758                     | 0.002                                |        | 31.9957  |                                      |         |
| 29.5114                    | 0.018                                | 0.068  | 59.3038  | 0.007                                | 0.010   |
| 29.5302                    |                                      |        | 59.3110  |                                      |         |
| 29.6859                    |                                      | 0.069  | 61.5901  | 0.006                                | 30.565  |
| 29.6996                    | 0.013                                |        | 61.5969  |                                      |         |
| Complex 2                  |                                      |        |          |                                      |         |
| Energy                     | $\Delta_{\text{tun}}/\text{cm}^{-1}$ | $g_z$  | Energy   | $\Delta_{\text{tun}}/\text{cm}^{-1}$ | $g_z$   |
| 0.0000                     |                                      | 0.035  | 43.7937  | 0.097                                | 28.280  |
| 0.0009                     | 0.0009                               |        | 43.8910  |                                      |         |
| 1.5238                     |                                      | 36.645 | 44.1717  | 0.050                                | 28.393  |

## Supporting Information

|                  |                                      |          |          |                                      |        |
|------------------|--------------------------------------|----------|----------|--------------------------------------|--------|
| 1.5287           | 0.0049                               |          | 44.2223  |                                      |        |
| 42.8184          |                                      | 0.104    | 85.9314  | 0.002                                | 0.027  |
| 42.8522          | 0.033                                |          | 85.9332  |                                      |        |
| 43.2314          | 0.075                                | 0.156    | 86.5907  | 0.2                                  | 22.600 |
| 43.3072          |                                      |          | 86.7626  |                                      |        |
| <b>Complex 3</b> |                                      |          |          |                                      |        |
| Energy           | $\Delta_{\text{tun}}/\text{cm}^{-1}$ | $g_{zz}$ | Energy   | $\Delta_{\text{tun}}/\text{cm}^{-1}$ | $g_z$  |
| 0.0000           |                                      | 16.002   | 150.1008 | 0.0043                               | 11.168 |
| 0.0002           | 0.0002                               |          | 150.1051 |                                      |        |
| 2.1699           | 0.0003                               | 35.241   | 151.8862 | 0.0056                               | 32.336 |
| 2.1702           |                                      |          | 151.8918 |                                      |        |
| 42.1553          | 0.0020                               | 17.197   | 192.2602 | 0.048                                | 13.054 |
| 42.1573          |                                      |          | 192.3089 |                                      |        |
| 43.5862          | 0.0129                               | 30.564   | 193.2379 | 0.069                                | 26.667 |
| 43.5991          |                                      |          | 193.3074 |                                      |        |

**Table S23.** Crystal data and structure refinement details of 1 to 3.

|                   | <b>1</b>                                                                    | <b>2</b>                                                                    | <b>3</b>                                                       |
|-------------------|-----------------------------------------------------------------------------|-----------------------------------------------------------------------------|----------------------------------------------------------------|
| Empirical formula | $\text{C}_{44}\text{H}_{22}\text{Dy}_2\text{F}_{24}\text{N}_4\text{O}_{10}$ | $\text{C}_{44}\text{H}_{28}\text{Dy}_2\text{F}_{12}\text{N}_4\text{O}_{10}$ | $\text{C}_{57}\text{H}_{75}\text{Dy}_2\text{N}_5\text{O}_{11}$ |
| Formula weight    | 1547.65                                                                     | 1325.70                                                                     | 1331.22                                                        |
| Temperature/K     | 293(2)                                                                      | 150.0                                                                       | 150.01                                                         |
| Crystal system    | monoclinic                                                                  | monoclinic                                                                  | monoclinic                                                     |
| Space group       | $P2_1/n$                                                                    | $P2_1/n$                                                                    | $P2_1/n$                                                       |
| a/Å               | 10.8075(3)                                                                  | 10.559(3)                                                                   | 13.2636(18)                                                    |
| b/Å               | 17.3606(5)                                                                  | 17.123(3)                                                                   | 35.219(5)                                                      |
| c/Å               | 13.7617(4)                                                                  | 12.969(2)                                                                   | 13.709(2)                                                      |
| $\alpha/^\circ$   | 90                                                                          | 90                                                                          | 90                                                             |

## Supporting Information

|                                                   |                                                                    |                                                                    |                                                                       |
|---------------------------------------------------|--------------------------------------------------------------------|--------------------------------------------------------------------|-----------------------------------------------------------------------|
| $\beta/^\circ$                                    | 90.7690(10)                                                        | 91.215(14)                                                         | 97.401(3)                                                             |
| $\gamma/^\circ$                                   | 90                                                                 | 90                                                                 | 90                                                                    |
| Volume/ $\text{\AA}^3$                            | 2581.80(13)                                                        | 2344.3(9)                                                          | 6350.7(16)                                                            |
| Z                                                 | 2                                                                  | 2                                                                  | 4                                                                     |
| $\rho_{\text{calc}}/\text{cm}^3$                  | 1.991                                                              | 1.878                                                              | 1.392                                                                 |
| $\mu/\text{mm}^{-1}$                              | 3.018                                                              | 3.271                                                              | 2.391                                                                 |
| F(000)                                            | 1484.0                                                             | 1280.0                                                             | 2688.0                                                                |
| Crystal size/ $\text{mm}^3$                       | 0.056 × 0.033 ×<br>0.027                                           | 0.091 × 0.078 ×<br>0.057                                           | 0.046 × 0.037 ×<br>0.024                                              |
| Radiation                                         | MoK $\alpha$ ( $\lambda =$<br>0.71073)                             | MoK $\alpha$ ( $\lambda =$<br>0.71073)                             | MoK $\alpha$ ( $\lambda =$<br>0.71073)                                |
| 2 $\Theta$ range for data<br>collection/ $^\circ$ | 4.824 to 56.72                                                     | 5.028 to 50.736                                                    | 4.584 to 50.998                                                       |
| Index ranges                                      | -11 ≤ h ≤ 14, -23 ≤<br>k ≤ 23, -18 ≤ l ≤ 18                        | -12 ≤ h ≤ 12, -20 ≤<br>k ≤ 20, -15 ≤ l ≤ 15                        | -16 ≤ h ≤ 16, -40<br>≤ k ≤ 42, -16 ≤ l<br>≤ 16                        |
| Reflections<br>collected                          | 27196                                                              | 21676                                                              | 57708                                                                 |
| Independent<br>reflections                        | 6447 [ $R_{\text{int}} = 0.0251,$<br>$R_{\text{sigma}} = 0.0208$ ] | 4227 [ $R_{\text{int}} = 0.0212,$<br>$R_{\text{sigma}} = 0.0158$ ] | 11811 [ $R_{\text{int}} =$<br>0.0423, $R_{\text{sigma}} =$<br>0.0322] |
| Data/restraints/<br>parameters                    | 6447/0/379                                                         | 4227/6/342                                                         | 11811/0/676                                                           |
| Goodness-of-fit<br>on $F^2$                       | 1.035                                                              | 1.171                                                              | 1.246                                                                 |

## Supporting Information

|                               |                                                      |                                                      |                                                      |
|-------------------------------|------------------------------------------------------|------------------------------------------------------|------------------------------------------------------|
| Final R indexes<br>[I>2σ(I)]  | R <sub>1</sub> = 0.0358, wR <sub>2</sub> =<br>0.0964 | R <sub>1</sub> = 0.0290, wR <sub>2</sub> =<br>0.0659 | R <sub>1</sub> = 0.0584,<br>wR <sub>2</sub> = 0.1287 |
| Final R indexes<br>[all data] | R <sub>1</sub> = 0.0441, wR <sub>2</sub> =<br>0.1035 | R <sub>1</sub> = 0.0291, wR <sub>2</sub> =<br>0.0660 | R <sub>1</sub> = 0.0621,<br>wR <sub>2</sub> = 0.1310 |

### References

1. J. Long, F. Habib, P.-H. Lin, I. Korobkov, G. Enright, L. Ungur, W. Wernsdorfer, L. F. Chibotaru and M. Murugesu, Single-molecule magnet behavior for an antiferromagnetically superexchange-coupled dinuclear dysprosium (III) complex, *J. Am. Chem. Soc.*, 2011, **133**, 5319-5328.
2. W.-M. Wang, S.-Y. Wang, H.-X. Zhang, H.-Y. Shen, J.-Y. Zou, H.-L. Gao, J.-Z. Cui and B. Zhao, Modulating single-molecule magnet behaviour of phenoxo-O bridged lanthanide (III) dinuclear complexes by using different β-diketonate coligands, *Inorg. Chem. Front.*, 2016, **3**, 133-141.
3. L. Zhao, J. Wu, H. Ke and J. Tang, Three dinuclear lanthanide (iii) compounds of a polydentate Schiff base ligand: Slow magnetic relaxation behaviour of the Dy III derivative, *CrystEngComm*, 2013, **15**, 5301-5306.
4. S. Yu, Z. Hu, Z. Chen, B. Li, Y.-Q. Zhang, Y. Liang, D. Liu, D. Yao and F. Liang, Two dy (III) single-molecule magnets with their performance tuned by schiff base ligands, *Inorg. Chem.*, 2019, **58**, 1191-1200.

## Supporting Information

5. K. Zhang, D. Liu, V. Vieru, L. Hou, B. Cui, F.-S. Guo, L. F. Chibotaru and Y.-Y. Wang, Transitions of two magnetic interaction states in dinuclear Dy (III) complexes via subtle structural variations, *Dalton Trans.*, 2017, **46**, 638-642.
6. Y.-N. Guo, X.-H. Chen, S. Xue and J. Tang, Modulating magnetic dynamics of three Dy<sub>2</sub> complexes through keto–enol tautomerism of the o-vanillin picolinoylhydrazone ligand, *Inorg. Chem.*, 2011, **50**, 9705-9713.
7. A.-J. Hutchings, F. Habib, R. J. Holmberg, I. Korobkov and M. Murugesu, Structural rearrangement through lanthanide contraction in dinuclear complexes, *Inorg. Chem.*, 2014, **53**, 2102-2112.
8. S. Biswas, S. Das, G. Rogez and V. Chandrasekhar, Hydrazone-Ligand-Based Homodinuclear Lanthanide Complexes: Synthesis, Structure, and Magnetism, *Eur. J. Inorg. Chem.*, 2016, **2016**, 3322-3329.
9. S.-Y. Lin, G.-F. Xu, L. Zhao, Y.-N. Guo, Y. Guo and J. Tang, Observation of slow magnetic relaxation in triple-stranded lanthanide helicates, *Dalton Trans.*, 2011, **40**, 8213-8217.
10. Y.-J. Wang, D.-F. Wu, J. Gou, Y.-Y. Duan, L. Li, H.-H. Chen, H.-L. Gao and J.-Z. Cui, Modulation of the properties of dinuclear lanthanide complexes through utilizing different  $\beta$ -diketonate co-ligands: near-infrared luminescence and magnetization dynamics, *Dalton Trans.*, 2020, **49**, 2850-2861.
11. Y. Ge, Y. Huang, J. L. B. Montenegro, Y. Cui, W. Liu, Y. Li and B. L. Wang, Synthesis, Structures, and Single-Molecule Magnetic Properties of Three Dy<sub>2</sub> Complexes, *Chem. Asian J.*, 2019, **14**, 986-994.



## Supporting Information

12. H. Tian, L. Ungur, L. Zhao, S. Ding, J. Tang and L. F. Chibotaru, Exchange Interactions Switch Tunneling: A Comparative Experimental and Theoretical Study on Relaxation Dynamics by Targeted Metal Ion Replacement, *Chem. Eur. J.*, 2018, **24**, 9928-9939.
13. Y.-X. Chang, W.-M. Wang, R.-X. Zhang, H.-Y. Shen, X.-P. Zhou, N.-N. Wang, J.-Z. Cui and H.-L. Gao, Dinuclear Ln (III) complexes constructed from an 8-hydroxyquinoline Schiff base derivative with different terminal groups show differing slow magnetic relaxation, *New J Chem*, 2017, **41**, 6251-6261.
14. J. Acharya, N. Ahmed, J. F. Gonzalez, P. Kumar, O. Cador, S. K. Singh, F. Pointillart and V. Chandrasekhar, Slow magnetic relaxation in a homo dinuclear Dy (III) complex in a pentagonal bipyramidal geometry, *Dalton Trans.* 2020, **49**, 13110-13122.
15. S. Xue, Y. N. Guo, L. Ungur, J. Tang and L. F. Chibotaru, Tuning the Magnetic Interactions and Relaxation Dynamics of Dy<sub>2</sub> Single-Molecule Magnets, *Eur. J. Chem*, 2015, **21**, 14099-14106.
16. H.-M. Dong, H.-Y. Li, Y.-Q. Zhang, E.-C. Yang and X.-J. Zhao, Magnetic relaxation dynamics of a centrosymmetric Dy<sub>2</sub> single-molecule magnet triggered by magnetic-site dilution and external magnetic field, *Inorg. Chem.*, 2017, **56**, 5611-5622.
17. J.-Y. Ge, H.-Y. Wang, J. Su, J. Li, B.-L. Wang, Y.-Q. Zhang and J.-L. Zuo, Modulating the magnetic interaction in new triple-decker dysprosium (III) single-molecule magnets, *Inorg. Chem.*, 2018, **57**, 1408-1416.
18. D. Li, M.-M. Ding, Y. Huang, D. F. T. Yepes, H. Li, Y. Li, Y.-Q. Zhang and J. Yao, Evolution from a single relaxation process to two-step relaxation processes of Dy<sub>2</sub> single-molecule magnets via the modulations of the terminal solvent ligands, *Dalton Trans.* 2021, **50**, 217-228.

## Supporting Information

19. Y. Ge, D. Li, G. Wang, Y. Cui, M. S. Najib, Y. Li and B. L. Wang, Single-Molecule Magnetism in Three Dy<sub>2</sub> Complexes from the Use of a Pentadentate Schiff Base Ligand and Different Benzoates, *Chem. Asian J.*, 2019, **14**, 2846-2852.
20. W. Zhang, S.-M. Xu, Z.-X. Zhu, J. Ru, Y.-Q. Zhang and M.-X. Yao, Strong intramolecular Dy III–Dy III magnetic couplings up to 15.00 cm<sup>-1</sup> in phenoxy-bridged dinuclear 4f complexes, *New J. Chem.*, 2020, **44**, 2083-2090.
21. W.-Y. Zhang, Y.-M. Tian, H.-F. Li, P. Chen, W.-B. Sun, Y.-Q. Zhang and P.-F. Yan, A series of dinuclear Dy (III) complexes bridged by 2-methyl-8-hydroxyquinoline: replacement on the periphery coordinated β-diketonate terminal leads to different single-molecule magnetic properties, *Dalton Trans.*, 2016, **45**, 3863-3873.
22. W.-Y. Zhang, Y.-Q. Zhang, S.-D. Jiang, W.-B. Sun, H.-F. Li, B.-W. Wang, P. Chen, P.-F. Yan and S. Gao, Dramatic impact of the lattice solvent on the dynamic magnetic relaxation of dinuclear dysprosium single-molecule magnets, *Inorg. Chem. Front.*, 2018, **5**, 1575-1586.
23. F. Aquilante, J. Autschbach, R. K. Carlson, L. F. Chibotaru, M. G. Delcey, L. De Vico, I. Fdez. Galván, N. Ferré, L. M. Frutos and L. Gagliardi, Molcas 8: New capabilities for multiconfigurational quantum chemical calculations across the periodic table. *Journal*, 2016.
24. P.-Å. Malmqvist and B. O. Roos, The CASSCF state interaction method, *Chemical physics letters*, 1989, **155**, 189-194.
25. P. A. M. J. Finley, B. O. Roos, L. Serrano-Andres, , The multi-state CASPT2 method, *Chem. Phys. Lett*, 1998, **288**, 9-306.

## Supporting Information

26. P. Å. Malmqvist, K. Pierloot, A. R. M. Shahi, C. J. Cramer and L. Gagliardi, The restricted active space followed by second-order perturbation theory method: Theory and application to the study of Cu O 2 and Cu 2 O 2 systems, *J. Chem. Phys.* , 2008, **128**, 204109.
27. P. Å. Malmqvist, A. Rendell and B. O. Roos, The restricted active space self-consistent-field method, implemented with a split graph unitary group approach, *J. Phys. Chem.* , 1990, **94**, 5477-5482.
28. D. Ma, G. Li Manni and L. Gagliardi, The generalized active space concept in multiconfigurational self-consistent field methods, *J. Chem. Phys.* , 2011, **135**, 044128.
29. B. O. Roos, V. Veryazov and P.-O. Widmark, Relativistic atomic natural orbital type basis sets for the alkaline and alkaline-earth atoms applied to the ground-state potentials for the corresponding dimers, *Chem. Acc*, 2004, **111**, 345-351.
30. P. Å. Malmqvist, B. O. Roos and B. Schimmelpfennig, The restricted active space (RAS) state interaction approach with spin-orbit coupling, *Chem. Phys. Lett.* , 2002, **357**, 230-240.
31. K. L. Harriman, J. J. Le Roy, L. Ungur, R. J. Holmberg, I. Korobkov and M. Murugesu, Cycloheptatrienyl trianion: an elusive bridge in the search of exchange coupled dinuclear organolanthanide single-molecule magnets, *Chem. Sci.* , 2017, **8**, 231-240.
32. P. Zhang, M. Perfetti, M. Kern, P. P. Hallmen, L. Ungur, S. Lenz, M. R. Ringenberg, W. Frey, H. Stoll and G. Rauhut, Exchange coupling and single molecule magnetism in redox-active tetraoxolene-bridged dilanthanide complexes, *Chem. Sci.* , 2018, **9**, 1221-1230.

## Supporting Information

33. I. F. Diaz-Ortega, J. M. Herrera, D. Aravena, E. Ruiz, T. Gupta, G. Rajaraman, H. Nojiri and E. Colacio, Designing a Dy<sub>2</sub> single-molecule magnet with two well-differentiated relaxation processes by using a nonsymmetric Bis-bidentate bipyrimidine-n-oxide ligand: a comparison with mononuclear counterparts, *Inorg. Chem.* , 2018, **57**, 6362-6375.
34. I. F. Díaz-Ortega, J. M. Herrera, Á. Reyes Carmona, J. R. Galán-Mascarós, S. Dey, H. Nojiri, G. Rajaraman and E. Colacio, A Chiral Bipyrimidine-Bridged Dy<sub>2</sub> SMM: A Comparative Experimental and Theoretical study of the Correlation between the Distortion of the DyO<sub>6</sub>N<sub>2</sub> coordination sphere and the anisotropy barrier, *Front. Chem.*, 2018, 537.
35. H.-M. Dong, H.-Y. Li, Y.-Q. Zhang, E.-C. Yang and X.-J. Zhao, Magnetic relaxation dynamics of a centrosymmetric Dy<sub>2</sub> single-molecule magnet triggered by magnetic-site dilution and external magnetic field, *Inorg. Chem.*, 2017, **56**, 5611-5622.
